1 Linear summation of metabotropic postsynaptic potentials follows coactivation of neurogliaform  
2 interneurons

3

4 *Attila Ozsvár<sup>1</sup>, Gergely Komlósi<sup>1</sup>, Gáspár Oláh<sup>1</sup>, Judith Baka<sup>1</sup>, Gábor Molnár<sup>1</sup>, Gábor Tamás<sup>1,2,\*</sup>*

5 <sup>1</sup> *MTA-SZTE Research Group for Cortical Microcircuits of the Hungarian Academy of Sciences,*  
6 *Department of Physiology, Anatomy and Neuroscience, University of Szeged, 52 Közép fasor, Szeged*  
7 *6726, Hungary*

8 <sup>2</sup> *Lead Contact*

9 \* Correspondence: [gtamas@bio.u-szeged.hu](mailto:gtamas@bio.u-szeged.hu) (G.T.)

10

## 11 **Summary**

12

13 Summation of ionotropic receptor-mediated responses is critical in neuronal computation by shaping  
14 input-output characteristics of neurons. However, arithmetics of summation for metabotropic signals  
15 are not known. We characterized the combined ionotropic and metabotropic output of neocortical  
16 neurogliaform cells (NGFCs) using electrophysiological and anatomical methods. These experiments  
17 revealed that GABA receptors are activated up to 1.8 microns from release sites and confirmed  
18 coactivation of putative NGFCs in superficial cortical layers in vivo. Triple recordings from presynaptic  
19 NGFCs converging to a postsynaptic neuron revealed sublinear summation of ionotropic GABA<sub>A</sub>  
20 responses and linear summation of metabotropic GABA<sub>B</sub> responses. Based on a model combining  
21 distances of volume transmission from release sites and distributions of all NGFC axon terminals, we  
22 postulate that 2 to 3 NGFCs provide input to a point in the neuropil. We suggest that interactions of  
23 metabotropic GABAergic responses remain linear even if most superficial layer interneurons  
24 specialized to recruit GABA<sub>B</sub> receptors are simultaneously active.

25 **Keywords:** synaptic integration, neurogliaform cell, layer 1, neocortex, metabotropic GABA<sub>B</sub> receptor

26

## 27 **Introduction**

28

29 Each neuron in the cerebral cortex receives thousands of excitatory synaptic inputs that drive action  
30 potential output. The efficacy and timing of excitation is effectively governed by GABAergic inhibitory  
31 inputs that arrive with spatiotemporal precision onto different subcellular domains. Synchronization  
32 of GABAergic inputs appears to be crucial in structuring cellular and network excitation and  
33 behaviorally relevant rhythmic population activity (Klausberger & Somogyi, 2008). Diverse  
34 subpopulations of GABAergic neurons contribute to network mechanisms at different temporal  
35 windows and synchronized cells of particular interneuron types appear to fire in a stereotyped fashion  
36 (Klausberger & Somogyi, 2008). In general, this frequently results in coactivation of similar (and  
37 asynchronization of dissimilar) GABAergic inputs arriving to target neurons (Jang et al., 2020; Karnani  
38 et al., 2016; Kvitsiani et al., 2013), that leads to postsynaptic summation of GABAergic responses  
39 synchronously activated by presynaptic cells of the same type. Most GABAergic cell types exert  
40 inhibitory control through ionotropic GABA<sub>A</sub> receptors allowing Cl<sup>-</sup> ions to pass rapidly through the

41 membrane (Barker, Ransom, & Neurobiology, 2009) and depending on the magnitude of GABA release  
42 and/or the number of synchronously active presynaptic interneurons, synaptic and extrasynaptic  
43 GABA<sub>A</sub> receptors could be recruited. The integration of ionotropic inhibitory signals on the surface of  
44 target cell dendrites is temporally precise and spatially specific (Bloss et al., 2016; Klausberger, 2009;  
45 Müller, Beck, Coulter, & Remy, 2012). Summation of ionotropic receptor-mediated responses are  
46 extensively studied in the neocortex and predominantly characterized by nonlinear rules of interaction  
47 (Jadi, Polsky, Schiller, & Mel, 2012; Koch, Poggio, & Torre, 1983; London & Häusser, 2005; Qian &  
48 Sejnowski, 1990; Silver, 2010). In addition to GABA<sub>A</sub> receptors, metabotropic GABA<sub>B</sub> receptor  
49 activation can occur during synchronized and/or long lasting activation of GABAergic inputs (Dutar &  
50 Nicoll, 1988; Isaacson, Solis, & Nicoll, 1993; Mody, De Koninck, Otis, & Soltesz, 1994; Scanziani, 2000;  
51 Thomson & Destexhe, 1999). Among the various interneuron subtypes identified in the neocortex  
52 (Ascoli et al., 2008; Markram et al., 2004; Schuman et al., 2019), only NGFCs are known to be especially  
53 effective in recruiting metabotropic GABA<sub>B</sub> receptors in addition to ionotropic GABA<sub>A</sub> receptors by  
54 sporadic firing using single cell triggered volume transmission in the microcircuit (Oláh et al., 2009;  
55 Tamas, 2003). GABA binding to GABA<sub>B</sub> receptors catalyzes GDP/GTP exchange at the G $\alpha$  subunit and  
56 the separation of G $\beta\gamma$  (Bettler, Kaupmann, Mosbacher, & Gassmann, 2004). The G $\beta\gamma$  subunits - as  
57 membrane-anchored proteins - locally diffuse in the plasma membrane and up to four G $\beta\gamma$  subunits  
58 bind cooperatively to G-protein gated inward rectifier (GIRK) channels and trigger a channel opening  
59 that drives the membrane potential towards the K<sup>+</sup> reverse potential (Dascal, 1997; Inanobe & Kurachi,  
60 2014; Stanfield, Nakajima, & Nakajima, 2002; Wang, Touhara, Weir, Bean, & MacKinnon, 2016;  
61 Wickman & Clapham, 1995). Activation of GABA<sub>B</sub> receptors by NGFCs control the firing of dendritic  
62 spikes in the distal dendritic domain in pyramidal cells (PCs) (Larkum, Kaiser, & Sakmann, 2002; L. M.  
63 Palmer et al., 2012; Wozny & Williams, 2011) and activity in the prefrontal cortex is effectively  
64 controlled by the strong feed-forward GABA<sub>B</sub> inhibition mediated by NGFCs (Jackson, Karnani,  
65 Zemelman, Burdakov, & Lee, 2018). Moreover, GABA<sub>B</sub> receptors contribute to termination of  
66 persistent cortical activity (Craig, Mayne, Bettler, Paulsen, & McBain, 2013) and slow inhibition  
67 contributes to theta oscillations in the hippocampus (Capogna & Pearce, 2011). Relative to the  
68 summation of ionotropic responses, postsynaptic summation properties of metabotropic receptors  
69 are unexplored and to date, there has been no experimental analysis of how neurons integrate electric  
70 signals that are linked to inhibitory metabotropic receptors. We set out to test the summation of  
71 metabotropic receptor-mediated postsynaptic responses by direct measurements of convergent  
72 inputs arriving from simultaneously active NGFCs and to characterize the likelihood and arithmetics of  
73 metabotropic receptor interactions in a model of population output by incorporating experimentally  
74 determined functional and structural synaptic properties of NGFCs.

75

## 76 **Results**

### 77 **Quantal and structural characteristics of GABAergic connections established by individual** 78 **neurogliaform cells**

79 NGFCs are capable of activating postsynaptic receptors in the vicinity of their presynaptic boutons via  
80 volume transmission (Oláh et al., 2009). To gain insight into the possible effective radius of volume  
81 transmission we characterized properties of NGFC-PC connections. *In vitro* simultaneous dual whole-  
82 cell patch clamp recordings were carried out on synaptically connected L1 NGFC to L2/3 PC pairs in  
83 brain slices from the somatosensory cortex of juvenile male Wistar rats. Pre- and postsynaptic cells  
84 were chosen based on their characteristic passive membrane and firing properties (Fig. 1A) and  
85 recorded neurons were filled with biocytin, allowing *post hoc* anatomical reconstruction of recorded  
86 cells and estimation of putative synaptic release sites (Fig. 1B, H). Single action potentials triggered in  
87 NGFCs elicit biphasic GABA<sub>A</sub> and GABA<sub>B</sub> receptor-mediated responses on the target neurons (Tamas,  
88 2003). To determine the number of functional release sites, we recorded IPSCs under different release  
89 probability by varying extracellular Ca<sup>2+</sup> and Mg<sup>2+</sup> concentrations (Fig. 1C, F). NGFC evoked inhibitory

90 postsynaptic potentials show robust use-dependent synaptic depression, therefore we limited the  
91 intervals of action potential triggered in NGFCs to 1 minute (Karayannis et al., 2010; Tamas, 2003). We  
92 collected a dataset of  $n = 8$  NGFC to PC pairs with an average of  $65.5 \pm 5.264$  trials per pair and  $32.75 \pm$   
93  $4.155$  trials for a given  $Mg^{2+}/Ca^{2+}$  concentration per conditions. The limited number of trials due to the  
94 use-dependent synaptic depression of NGFCs restricted our approach to Bayesian Quantal Analysis  
95 (BQA) previously shown to be robust for the estimation of quantal parameters (Bhumbra & Beato,  
96 2013a). As expected, IPSC peak amplitudes were modulated by elevated (3 mM) and reduced (1.5 mM  
97 or 2 mM) extracellular  $Ca^{2+}$  concentrations consistent with the decline in release probability (Fig. 1D).  
98 Distributions of IPSC amplitudes detected in paired recordings were in good agreement with the  
99 estimated quantal amplitude distribution derived from the BQA (Fig. 1E). According to BQA, the  
100 estimated mean number of functional release sites (Nfrs) was  $10.96 \pm 8.1$  with a mean quantal size (q)  
101 of  $3.93 \pm 1.21$  pA (Fig. 1G). Full reconstruction of functionally connected NGFC-PC pairs ( $n = 6$ ) allowed  
102 comparisons of the Nfrs estimated by BQA and the number of putative release sites by counting the  
103 number of presynaptic boutons located within increasing radial distances measured from postsynaptic  
104 dendrites (Fig. 1H). Previous experiments showed that direct synaptic junctions are not required for  
105 functional NGFC to PC connections (Oláh et al., 2009) and GABA reaches receptors up to  $3 \mu m$  from  
106 the release site (Farrant & Nusser, 2005; Overstreet-Wadiche & McBain, 2015; Overstreet, Jones, &  
107 Westbrook, 2000). In agreement with earlier observations (Oláh et al., 2009), direct appositions were  
108 not observed in most NGFC to PC pairs and the number of NGFC axonal boutons potentially involved  
109 in eliciting postsynaptic responses increased by systematically increasing the radial distance from the  
110 dendrites of PCs. Projecting the range of BQA-derived Nfrs estimates over the number of NGFC  
111 boutons putatively involved in transmission for the same connections (Fig. 1H, red lines) suggests an  
112 effective range of  $0.86$  to  $1.75 \mu m$  for nonsynaptic volume transmission from NGFCs to PCs supporting  
113 previous reports on distances covered by extrasynaptic GABAergic communication (Farrant & Nusser,  
114 2005; Overstreet-Wadiche & McBain, 2015; Overstreet et al., 2000). Moreover, we detected linear  
115 correlation ( $r = 0.863$ ,  $p = 0.027$ ) between BQA-derived Nfrs and the number of NGFC boutons putatively  
116 involved in transmission at radial distances  $< 1.5 \mu m$  from PC dendrites; decreasing or increasing the  
117 distance resulted in the loss of correlation (Fig. 1I).

118

## 119 **Structural characteristics of GABAergic connections established by the population of layer 1** 120 **neurogliaform cells**

121 To have a better idea about how does the volume transmission radius potentially affect the fraction of  
122 converging outputs of L1 NGFC population to the same space, we developed a model to assess the  
123 overall output of NGFCs located in the supragranular layers of the neocortex. Unitary volume  
124 transmission by NGFCs is limited to their extremely dense axonal arborization (Oláh et al., 2009; Rózsa  
125 et al., 2017) Therefore, we determined the three-dimensional distribution of axon lengths of individual  
126 NGFCs with Sholl analysis (Fig. 2A). By superimposing individual NGFC reconstructions centered by  
127 their somata ( $n = 16$ ; Fig. 2C) a representative distribution of axons was calculated as a function of  
128 distance from the soma Fig. 2D). We also assessed the distance between axonal boutons ( $n = 1456$ )  
129 along reconstructed axons of NGFCs ( $n = 6$ ) and found that interbouton distances were  $3.36 \pm 2.54 \mu m$   
130 (Supplementary Fig. 1). Next, we developed an algorithm that generates model NGFCs ( $n = 52$ ) by  
131 growing axon arborizations similar ( $p = 0.99$ , two-sided K-S test, Fig. 2D) to the population of the  
132 experimentally reconstructed representative distribution of NGFC axons ( $n = 16$ ) using interactions of  
133 segment lengths, branch point locations and segment orientations while keeping the density of axonal  
134 boutons along axon segments (Fig. 2B, C). In order to achieve a relatively complete representation of  
135 all NGFC axon terminals in a model at the population level, we performed immunohistochemical  
136 labelling of  $\alpha$ -actinin2, which is known to label the overwhelming majority of supragranular NGFCs in

137 the neocortex (Uematsu et al., 2008). Somata immunoreactive for  $\alpha$ -actinin2 in superficial cortical  
138 layers showed distribution along the axis perpendicular to the surface of the cortex with a peak at ~50-  
139 150  $\mu\text{m}$  distance from the pia mater (Fig. 2E). According to this radial distribution and with no apparent  
140 tendency along the horizontal axis we placed NGFC somata in a  $354 \times 354 \times 140 \mu\text{m}$  volume to create  
141 a realistic spatial model of L1 NGFC population (Fig. 2F). Three dimensional pairwise shortest distances  
142 between  $\alpha$ -actinin2+ somata ( $n= 152$ ) and distances between somata placed into the model space ( $n=$   
143  $374$ ) were similar ( $p= 0.51$ , two-sided K-S test, Fig. 2G). We then used the axon growing algorithm  
144 detailed above from each soma position to model a population-wide distribution of NGFC axonal  
145 release sites. Quantal and structural properties of NGFC to PC connections shown above suggest a  
146 volume transmission distance of  $\sim 1.5 \mu\text{m}$  from potential sites of release (Fig. 1H, I), thus we mapped  
147 the coverage of surrounding tissue with GABA simultaneously originating from all NGFC terminals with  
148 a  $1.5 \mu\text{m}$  of transmitter diffusion in the model. Using these conditions in simulations ( $n= 36$ ), less than  
149 8 NGFC axonal terminals contributed as effective GABA sources at any location in the superficial  
150 neocortex (Fig. 2H). Moreover, these boutons originated from a limited number of presynaptic NGFCs;  
151 when considering the extreme case of population-level cooperativity, i.e. when all putative NGFCs  
152 were active, most frequently a single NGFC release site serve as a GABA source ( $67.7 \pm 7\%$ ) and  
153 potential interactions between two, three or more different NGFCs take place in limited occasions  
154 ( $15.34 \pm 2.1\%$ ,  $8.5 \pm 2.6\%$  and  $8.45 \pm 3.16\%$ , respectively). The outcome of these simulations is  
155 consistent with earlier results suggesting that single cell driven volume transmission covers only the  
156 close proximity of NGFCs (Oláh et al., 2009) but also indicates potential interactions between a  
157 restricted number of neighbouring NGFCs.

158

#### 159 **Coactivation of putative neurogliaform cells in L1 somatosensory cortex *in vivo***

160 Transcallosal fibers establish interhemispheric inhibition that operates via GABA<sub>B</sub> receptor activation  
161 located on apical dendrites (L. M. Palmer et al., 2012) and it has been suggested that this massive  
162 GABA<sub>B</sub> receptor recruitment in the superficial layers includes the activation of NGFCs (L. Palmer,  
163 Murayama, & Larkum, 2012). To assess the fraction of synchronously active putative NGFCs under  
164 close to physiological conditions, we applied *in vivo* two-photon  $\text{Ca}^{2+}$  imaging. We monitored the  
165 activity of L1 neurons bulk-loaded with calcium indicator Oregon Green BAPTA-1-AM (OGB-1-AM) (Fig.  
166 3A) during hindlimb stimulation, which results in the activation of transcallosal inputs in L1 of the  
167 somatosensory cortex of urethane-anaesthetized rats ( $n= 6$ ). Stimulation of the ipsilateral hindlimb  
168 (200 mA, 10ms) evoked  $\text{Ca}^{2+}$  signals in a subpopulation of neurons in L1 ( $n= 114$  neurons;  $n= 46$  vs. 68  
169 responsive vs. non-responsive neurons, respectively; data pooled from six animals; Fig. 3B, 3C). On  
170 average  $38.2 \pm 5.2\%$  of the L1 neurons were active following ipsilateral hindlimb stimulation, which is  
171 remarkably similar to the proportion found earlier (L. M. Palmer et al., 2012) (Fig. 3E). To further  
172 identify L1 neurons active during hindlimb stimulation, we performed immunohistochemistry for the  
173 actin-binding protein  $\alpha$ -actinin2, (Uematsu et al., 2008) (Fig. 3F) using the same cortical area of L1 on  
174 which two-photon imaging was performed previously. Cross examination of neurons responsive/non-  
175 responsive to hindlimb stimulation versus neurons immunopositive/negative for  $\alpha$ -actinin2 revealed  
176 that the majority of the active neurons were  $\alpha$ -actinin2 positive (10 out of 15 neurons, 67%,  $n= 2$   
177 animals) and the majority of inactive neurons were  $\alpha$ -actinin2 negative (22 out of 26 neurons, 85%,  
178 Fig. 3G) suggesting that a substantial fraction of L1 NGFCs are activated during hindlimb stimulation.

179

#### 180 **Summation of convergent, unitary IPSPs elicited by NGFC**

181 Our *in vivo* measurements above corroborate earlier results (L. M. Palmer et al., 2012) on widespread  
182 simultaneous activation of putative L1 NGFCs in response to transcallosal inputs. To directly measure  
183 the summation of converging inputs from superficial NGFCs, *in vitro* simultaneous triple recordings  
184 were performed from two presynaptic NGFCs and a target PC (n= 4, Fig. 4A). First we measured the  
185 amplitude of unitary IPSPs (n= 8) elicited by single NGFCs in the target PC and found that smaller and  
186 bigger inputs in a triplet were  $-1.68 \pm 1.51$  mV and  $-2.19 \pm 1.33$  mV, respectively. Next we activated the  
187 two NGFC inputs synchronously ( $0.17 \pm 0.05$  ms) and such coactivation resulted in moderately  
188 sublinear summation of convergent IPSPs (maximal nonlinearity,  $-9.1 \pm 4.3$  %) measured as the  
189 difference of calculated ( $-3.81 \pm 2.76$  mV) and experimentally determined ( $-3.57 \pm 2.55$  mV) sums of  
190 convergent single inputs (n= 4; Fig. 4B). These results are in line with experiments showing moderately  
191 sublinear interactions between identified, single cell evoked fast IPSPs (Tamás, Szabadics, & Somogyi,  
192 2002). Interestingly, the time course of sublinearity followed the fast, presumably GABA<sub>A</sub> receptor-  
193 mediated part of the unitary and summated IPSPs (Fig. 4C) suggesting that ionotropic and  
194 metabotropic GABAergic components of the same input combinations might follow different rules of  
195 summation. To test the interaction of unitary GABA<sub>B</sub> receptor-mediated IPSPs directly, we repeated  
196 the experiments above with the application of the GABA<sub>A</sub> receptor antagonist gabazine (10  $\mu$ M).  
197 Pharmacological experiments on the output of NGFCs are very challenging due to the extreme  
198 sensitivity of NGFC triggered IPSPs to presynaptic firing frequency (Capogna, 2011; Tamás,  
199 Simon Anna, & Szabadics, 2003) forcing us to collect the data in a different set of triple recordings (n=  
200 8, Fig. 4D). As expected (Tamás et al., 2003) unitary, gabazine insensitive, slow IPSPs had onset  
201 latencies, rise times and half-widths similar to GABA<sub>B</sub> receptor-mediated responses ( $49.42 \pm 5.8$  ms,  
202  $86.95 \pm 8.82$  ms, and  $252.27 \pm 36.92$  ms, respectively, n= 16, Fig. 4E). Peak amplitudes of converging  
203 smaller and bigger slow IPSPs were  $-0.66 \pm 0.22$  mV and  $-0.94 \pm 0.37$  mV respectively. Synchronous  
204 activation of two presynaptic NGFC converging onto the same pyramidal cell resulted in linear ( $-1.6 \pm$   
205  $6.6\%$ ) summation of slow IPSPs as peak amplitudes of calculated sums of individual inputs versus  
206 experimentally recorded compound responses were  $-1.58 \pm 0.53$  mV and  $-1.60 \pm 0.55$  mV, respectively  
207 (Fig. 4F). Taken together, our triple recordings in gabazine versus control conditions suggest linear  
208 interactions between slow, GABA<sub>B</sub> IPSPs as opposed to sublinearly summing fast, GABA<sub>A</sub> IPSPs  
209 elicited by the same presynaptic interneuron population.

210

## 211 **Integration of GABA<sub>B</sub> receptor-mediated responses are not affected by HCN channel and GABA** 212 **reuptake**

213 The predominant target area of the superficial NGFCs, the distal apical dendritic membrane of PCs,  
214 express voltage-dependent hyperpolarization-activated cyclic nucleotide-gated channel 1 (HCN1)  
215 known to attenuate dendritic signals (Berger, Larkum, & Lüscher, 2001; Kalmbach et al., 2018; Lörincz,  
216 Notomi, Tamás, Shigemoto, & Nusser, 2002; Robinson & Siegelbaum, 2003; Sheets et al., 2011). To  
217 investigate whether HCN1 channels contribute to mechanisms of interactions between GABA<sub>B</sub>  
218 receptor-mediated postsynaptic responses we performed experiments on NGFC-to-PC pairs and  
219 evoked 1 to 4 action potentials (APs) in a single presynaptic NGFC at 100 Hz. This experimental  
220 configuration mimics the extreme conditions when multiple presynaptic release sites converge in a  
221 tight space and creating excessive GABA<sub>B</sub> receptor mediated inhibition. (Fig 5A). Triggering a single  
222 spike in the presence of gabazine (10  $\mu$ M) did not saturate postsynaptic GABA<sub>B</sub> receptors since the  
223 postsynaptic response induced by two spikes was proportional to the arithmetic sum of unitary  
224 postsynaptic responses (experimental sums:  $-1.25$  mV calculated sums:  $-1.26$  mV), apparently showing  
225 linear summation properties similar to triple recordings testing summation convergent inputs above.  
226 However, further increase in the number of evoked APs to 3 and 4 introduced sublinearity to  
227 summation (n= 6, 1AP:  $-0.63 \pm 0.50$  mV, 2APs:  $-1.25 \pm 1.06$  mV, 3APs:  $-1.53 \pm 0.84$  mV, 4APs:  $-1.61 \pm$



228 1.09 mV, Fig. 5B; normalized values: 2APs:  $2.00 \pm 1.08$ , 3APs:  $2.34 \pm 1.16$ , 4APs:  $3.17 \pm 1.26$ , Fig. 5C).  
229 Importantly, recordings in the presence of HCN1 channel blocker, ZD-2788 (10  $\mu\text{m}$ ) showed summation  
230 properties similar to control, summation was linear with two APs and changed to slightly sublinear  
231 upon the 3rd to 4th spike, (n= 5, 1AP:  $-0.82 \pm 0.63$  mV, 2APs:  $-1.59 \pm 0.76$  mV, 3APs:  $-1.66 \pm 0.72$  mV,  
232 4APs:  $-1.90 \pm 1.07$  mV, Fig. 5B; normalized values and its comparison to control: 2APs:  $2.06 \pm 1.06$ , p=  
233 0.983; 3APs:  $1.99 \pm 1.17$ , p= 0.362; 4APs:  $2.56 \pm 1.6$ , p= 0.336; two-sided MW U test, Fig. 5C). These  
234 experiments suggest that when a physiologically probable number of NGFCs are simultaneously active,  
235 HCN1 channels are locally not recruited to interfere with the summation of GABA<sub>B</sub> receptor-mediated  
236 responses.

237 Previous experiments suggested that a single AP in a NGFC is able to fill the surrounding extracellular  
238 space with an effective concentration of GABA (Oláh et al., 2009) and, in turn, extracellular GABA  
239 concentration producing GABA<sub>B</sub> receptor activation is tightly regulated via GABA transporters (GAT-1)  
240 (Gonzalez-Burgos, Rotaru, Zaitsev, Povysheva, & Lewis, 2009; Isaacson et al., 1993; Rózsa et al., 2017;  
241 Szabadics, Tamas, & Soltesz, 2007). Therefore, we tested whether GAT-1 activity affects the  
242 summation of GABA<sub>B</sub> receptor-mediated responses potentially limiting the number of GABA<sub>B</sub> receptors  
243 reached by GABA released by NGFCs. Selective blockade of GAT-1 with NO-711 (10  $\mu\text{m}$ ) increased the  
244 amplitude of GABA<sub>B</sub> receptor-mediated IPSP, however, it did not influence summation properties (n=  
245 6, 1AP:  $-1.11 \pm 0.62$  mV, 2APs:  $-2.28 \pm 1.07$  mV, 3APs:  $-3.1 \pm 0.40$  mV, 4APs:  $-3.54 \pm 1.59$  mV, Fig. 5B;  
246 normalized values and its comparison to control: 2APs:  $2.06 \pm 1.17$ , p= 0.853; 3APs:  $2.36 \pm 0.31$ , p=  
247 0.645; 4APs:  $2.97 \pm 1.54$ , p= 0.515; two-sided MW U test, Fig. 5C). Accordingly, interactions between  
248 an *in vivo* realistic number of simultaneously active NGFCs lead to linear GABA<sub>B</sub> response summation  
249 even if increased concentration of GABA is present in the extracellular space.

250

### 251 **Subcellular localization of GABA<sub>B</sub> receptor-GIRK channel complex determines summation** 252 **properties**

253 High resolution quantitative electron microscopy showed that GABA<sub>B</sub> receptors and GIRK channels are  
254 segregated on dendritic shafts, however, receptor-channel complexes colocalize on dendritic spines  
255 (Á. Kulik et al., 2006). Theoretical studies suggest that the distance between the receptor and effector  
256 limits the recruitment of effector molecules to the vicinity of receptors (Brinkerhoff, Choi, &  
257 Linderman, 2008; Á. Kulik et al., 2006), thus we asked if linear summation was potentially a result of  
258 the locally constrained GABA<sub>B</sub> receptor - GIRK channel interaction when several presynaptic inputs  
259 converge. To this end, we constructed a simulation environment based on a previously published  
260 three-dimensional reconstruction of a postsynaptic dendritic segment (Edwards et al., 2014) targeted  
261 by realistically positioned release sites of NGFCs (Fig. 6A). Molecular interactions in this spatially  
262 realistic system were modeled using Monte Carlo algorithms to simulate movements and reactions of  
263 molecules (Kerr et al., 2008). Membranes of the postsynaptic dendritic segment were populated (see  
264 methods) with GABA<sub>B</sub> receptors and GIRK channels according to compartment-dependent data from  
265 SDS-digested freeze-fracture replica immunolabeling (Á. Kulik et al., 2006) (Fig. 6C). Neurotransmitter  
266 diffusion in the brain is influenced by tissue tortuosity and the fraction of extracellular space in total  
267 tissue volume (Sykova & Nicholson, 2008), thus we simulated realistic molecular diffusion in tortuous  
268 extracellular space (Tao, Tao, & Nicholson, 2005) (see methods). The number and position of NGFC  
269 presynaptic boutons around the postsynaptic dendritic segments in the model were used according to  
270 structural characteristics of GABAergic connections established by individual NGFCs (n= 4 boutons  $1.2$   
271  $\pm 0.7$   $\mu\text{m}$  from the dendrite; Fig. 1I, H) and according to the bouton density determined for the overall  
272 output of NGFC population (Fig. 2F). Previous work suggests that a single AP in a NGFC generates GABA  
273 concentrations of 1 to 60  $\mu\text{M}$  lasting for 20-200 ms (Karayannis et al., 2010) so we used a similar  $\sim 1$  to

274 60  $\mu$ M of GABA concentration range at 0.5 to 2  $\mu$ m distance from the release sites (Supplementary Fig.  
275 4) and GABA exposure times of  $114.87 \pm 2.1$  ms with decay time constants of  $11.52 \pm 0.14$  ms. Our  
276 modeling trials show that single AP triggered GABA release can activate a total of  $5.82 \pm 2.43$  GABA<sub>B</sub>  
277 receptors ( $2.81 \pm 1.55$  on spine,  $3.01 \pm 1.71$  on the shaft). Furthermore, activation of GABA<sub>B</sub> receptors  
278 triggers intracellular mechanisms and the initial GDP/GTP exchange at the G $\alpha$  subunit separates the G-  
279 protein heterotrimeric protein and produces G $\beta\gamma$  subunits (peak number of G $\beta\gamma$  subunits for single AP:  
280  $338.54 \pm 138.75$ ). Lateral membrane diffusion of G $\beta\gamma$  subunits lead to the activation of  $3.66 \pm 2.17$  GIRK  
281 channels in total ( $2.47 \pm 1.88$  on spine,  $1.17 \pm 1.26$  on the shaft) in response to single AP. Next,  
282 consecutive GABA releases were induced with 10 ms delays to replicate the 100 Hz stimulation  
283 protocol used in the experiments above (Fig. 5A). The increased GABA concentration from two  
284 sequential stimuli raised the number of active GABA<sub>B</sub> receptors to  $11.29 \pm 3.48$  ( $5.57 \pm 2.36$  on spine,  
285  $5.72 \pm 2.52$  on the shaft). Three and four consecutive releases activated a total of  $16.19 \pm 3.88$  and  
286  $20.99 \pm 4.99$  GABA<sub>B</sub> receptors, respectively ( $7.96 \pm 2.74$  on spine,  $8.23 \pm 2.97$  on the shaft and  $10.62 \pm$   
287  $3.28$  on spine,  $10.37 \pm 3.53$  on the shaft, respectively). When modeling consecutive GABA releases,  
288 massive amount of G $\beta\gamma$  subunits were produced together with a decline in relative production efficacy  
289 per APs, possibly due to the limited number of G-proteins serving as a substrate in the vicinity of active  
290 receptor clusters (peak number of G $\beta\gamma$  subunits for 2AP:  $612.10 \pm 171.95$ ; 3AP:  $857.78 \pm 194.14$ ; 4AP:  
291  $1081.81 \pm 229.57$ ). Two consecutive APs resulted in the activation of  $6.98 \pm 3.29$  GIRK channels ( $2.13$   
292  $\pm 1.63$  on dendritic shaft and  $4.85 \pm 2.65$  on spine) in the simulations. Importantly, this number of  
293 activated GIRK channels in response to two APs was close to the arithmetic sum of the number of GIRK  
294 channels activated by two single AP responses (-4.87% in total, -1.86% on spines and -9.86% on the  
295 shaft; Fig. 4E,5A). Further increase in the GABA exposure proportional to three and four action  
296 potentials lead to the activation of 10.39 and 12.89 GIRK channels, respectively ( $7.01 \pm 3.11$  and  $8.68$   
297  $\pm 3.46$  on spines and  $3.37 \pm 2.08$  and  $4.21 \pm 2.48$  on the shaft, respectively). These numbers of GIRK  
298 channels corresponded to -5.68 and -13.58% of the arithmetic sum of GIRK channels activated by three  
299 and four single AP responses (-5.71 and 13.82% on spines and -4.15 and -11.16% on the shaft).

300 GABA<sub>B</sub> receptor and GIRK channel complexes located in particular subcellular compartments appeared  
301 to have different effectiveness of recruiting GABA<sub>B</sub> receptors and active GIRK channels in our  
302 simulations (Fig. 6D). We observed different numbers of GABA<sub>B</sub> receptors activated on the shaft and  
303 spine (Normalized values to 1AP: 2APs: shaft:  $1.91 \pm 0.84$ , spine:  $1.98 \pm 0.84$ , n= 534, p= 0.009; 3APs:  
304 shaft:  $2.74 \pm 0.99$ , spine:  $2.84 \pm 0.98$ , n= 1871, p= 0.173; 3APs: shaft:  $3.45 \pm 1.18$ , spine:  $3.78 \pm 1.17$ , n=  
305 709, p< 0.005, two-sided MW U test, Fig. 6E). The recruitment of GIRK channels was more effective on  
306 spines compared to shafts when triggering 2 APs (Normalized values to 1AP: shaft:  $1.8 \pm 1.37$ , spine:  
307  $1.96 \pm 1.07$ , n=534, p<0.005); the trend was similar in response to three and four APs, but results were  
308 not significant (Normalized values to 1AP: 3AP: shaft:  $2.84 \pm 1.75$ , spine:  $2.84 \pm 1.26$ , n= 1871, p= 0.109;  
309 4AP: shaft:  $3.55 \pm 2.09$ , spine:  $3.52 \pm 1.4$ , n= 709, p= 0.216, two-sided MW U test, Fig. 6E). The  
310 compartment-specific effectiveness of signaling as the ratio of activated GIRK channels and active  
311 GABA<sub>B</sub> receptors (Fig. 6F) shows that spines represent the preferred site of action corroborating earlier  
312 suggestions (Qian & Sejnowski, 1990).

313

## 314 Discussion

315 The unique inhibitory communication via volume transmission separates NGFC interneurons from  
316 other interneuron classes in the neocortex. Numerous observations support the idea of volume  
317 transmission (Overstreet-Wadiche & McBain, 2015). (1) NGFC activation generates an unusually  
318 prolonged inhibition on the postsynaptic cell (Karayannis et al., 2010; Mańko, Bienvenu, Dalezios, &  
319 Capogna, 2012; Oláh et al., 2009; Szabadics et al., 2007). (2) Released GABA acts on synaptic and

320 extrasynaptic GABA receptors (Karayannis et al., 2010; Oláh et al., 2009; Price, 2005; Tamas, 2003), (3)  
321 as well as on nearby presynaptic terminals (Oláh et al., 2009). (4) NGFCs show a very high rate of  
322 functional coupling between the neighboring neurons (Jiang et al., 2015; Oláh et al., 2009). (5)  
323 Ultrastructural observations showed the lack of clearly defined postsynaptic elements in the  
324 apposition of the NGFC boutons (Maříko et al., 2012; Oláh et al., 2009; Vida, Halasy, Szinyei, Somogyi,  
325 & Buhl, 1998). (6) NGFCs act on astrocytes within the reach of their axonal arborization through  
326 nonsynaptic coupling (Rózsa et al., 2017). The distance of effective operation through NGFC driven  
327 volume transmission, however, is not clear. Here, we used functional and structural characterization  
328 of NGFC-PC inhibitory connections and suggest that GABA released from NGFC axonal terminals  
329 activates GABA receptors up to about  $\sim 1.8 \mu\text{m}$ , a result remarkably similar to previous estimations for  
330 the range of extrasynaptic action of synaptically released GABA (Farrant & Nusser, 2005; Overstreet-  
331 Wadiche & McBain, 2015; Overstreet et al., 2000) Our experiments also shed light to some quantal  
332 properties of NGFC's GABA release. These experiments are constrained by the robust use-dependent  
333 depression mediated by NGFCs (Karayannis et al., 2010; Tamás et al., 2003), therefore implementation  
334 of multiple probability fluctuation analysis (MPFA) (Silver, 2003), the gold standard for quantal analysis,  
335 was not feasible and BQA (Bhumbra & Beato, 2013b) was needed as an alternative. The revealed linear  
336 correlation between BQA-derived Nfrs and the number of NGFC boutons putatively involved in  
337 transmission is compatible with the release of a single docked vesicle from individual NGFC boutons  
338 and suggest that multivesicular release is not essential for GABAergic volume transmission.

339 The functional distance of volume transmission is particularly important for the characterization of  
340 interactions between NGFCs and for understanding the population output of NGFCs. Realistic  
341 representation of an entire subpopulation of neurons is considered essential for the interpretation of  
342 network functions (Karnani, Agetsuma, & Yuste, 2014; Markram et al., 2015) and pioneering full-scale  
343 data-driven models were effective in deciphering emerging functions of interneuron populations  
344 (Bezaire, Raikov, Burk, Vyas, & Soltesz, 2016). However, network diagrams addressing the function of  
345 NGFCs exclusively based on synaptic connectivity underestimate the spread of output without  
346 incorporating volume transmission by an order of magnitude (Oláh et al., 2009). Although the concept  
347 of blanket inhibition has been suggested for networks of interneurons populations having overlapping  
348 axonal arborizations and dense synaptic output (Karnani et al., 2014), our spatial model based on high  
349 resolution reconstructions of labeled NGFCs takes the concept to its extremes and reveals an  
350 unprecedented density of release sites for a population of cortical neuron and shows that the  
351 overwhelming majority of the superficial cortical space is effectively covered by at least one NGFC. At  
352 the same time, the redundancy of the NGFC population is limited and a single cortical spatial voxel is  
353 reached by GABA released from a limited number of individual NGFCs,  $\sim 83\%$  of space is covered by 1  
354 or 2 NGFCs. Our relatively simple *in vivo* approach to gauge potential synchronous action of NGFCs  
355 gave positive results. This is in line with earlier observations suggesting widespread action of putative  
356 NGFCs in terminating persistent activity (Craig et al., 2013), or powerfully suppressing dendritic  $\text{Ca}^{2+}$   
357 dynamics in L2/3 and L/5 (L. M. Palmer et al., 2012; Wozny & Williams, 2011). Strong cholinergic  
358 neuromodulation of NGFCs (Poorthuis et al., 2018) and frequent gap junctional coupling between  
359 NGFCs (Simon, Oláh, Molnár, Szabadics, & Tamás, 2005) further facilitates concerted action and are  
360 likely to play a major role in synchronizing the NGFC network (Yao et al., 2016).

361 When studying simultaneous action of NGFCs, our direct measurements of two converging NGFC  
362 inputs on L2/3 PC from simultaneous triple whole cell patch clamp recordings revealed sublinear  
363 summation properties for ionotropic  $\text{GABA}_A$  receptor mediated responses. These results support  
364 classic theories on synaptic input interactions (Jadi et al., 2012; Koch et al., 1983; London & Häusser,  
365 2005; Qian & Sejnowski, 1990; Silver, 2010) and are in line with earlier experiments measuring  
366 interactions of anatomically identified inputs converging to neighboring areas of the dendritic tree of



367 the same postsynaptic cell (Hao, Wang, Dan, Poo, & Zhang, 2009; Tamás et al., 2002). Mechanisms of  
368 interaction between convergent inputs from NGFCs might be similar to those suggested for short-term  
369 synaptic depression of GABA<sub>A</sub> responses such as local drops in Cl<sup>-</sup> driving force and membrane  
370 conductance (Huguenard & Alger, 1986; McCarren & Alger, 1985; Staley & Proctor, 1999). To our  
371 knowledge, the simultaneous triple recordings of two presynaptic NGFCs targeting the same  
372 postsynaptic PC represent the first direct experimental attempt addressing the summation of  
373 metabotropic receptor mediated postsynaptic interactions. To date, scarce computational model  
374 studies were aimed to explore the integration properties of GABA<sub>B</sub> receptor-mediated responses and  
375 suggested a highly supralinear interaction through the amplification effect of G-protein cooperativity  
376 (Destexhe, 1995). Our experimental approach indicates linear interactions between GABA<sub>B</sub> receptor  
377 mediated responses in case the number of converging presynaptic cells corresponds to the number of  
378 NGFCs cooperating during *in vivo* network operations. This suggests that converging afferents that act  
379 on inhibitory metabotropic receptors in the same postsynaptic voxel show linear or slightly sublinear  
380 summation, conserving the impact of individual inputs. However, we cannot exclude the possibility  
381 that widespread synchronization across various interneuron populations might shift the summation  
382 arithmetic in a nonlinear fashion.

383 Intrinsic properties of postsynaptic pyramidal cells might also contribute to the regulation of  
384 summation. HCN1 channels are known to be enriched in the distal dendrites of pyramidal cells and  
385 mediate K<sup>+</sup> cationic current activated by membrane hyperpolarization (Kalmbach et al., 2018; Lörincz  
386 et al., 2002; Robinson & Siegelbaum, 2003) Our experiments presented above show that summation  
387 properties in response to synchronized inputs from NGFCs are not significantly affected by HCN1  
388 channels, presumably due to the relatively moderate local hyperpolarization arriving from NGFCs;  
389 again, further studies are needed to test the influence of additional interneuron classes coactivated  
390 together with NGFCs. We predict that further GABAergic activity is unlikely to change summation  
391 arithmetics based on our negative results when blocking the high-affinity plasma membrane GABA  
392 transporters concentrated in the perisynaptic and extrasynaptic areas (Melone, Ciappelloni, & Conti,  
393 2015) effective in modulating GABA-mediated inhibition through extrasynaptic GABA spillover (Barbour  
394 & Häusser, 1997; Hamann, Rossi, & Attwell, 2002; Scanziani, 2000; Szabadics et al., 2007). Despite  
395 having similar summation arithmetics of two consecutive APs to the triple-recording configuration, it  
396 remains undefined as to what extent multiple presynaptic APs resemble synchronous activation of  
397 individual release sites. Presynaptic GABA<sub>B</sub> receptor-mediated decrease in Ca<sup>2+</sup> is unlikely (Karayannis  
398 et al., 2010), however, depletion of the readily releasable pool of vesicles leading to synaptic  
399 depression cannot be ruled out. As suggested by pioneering simulations on the summation of GABA<sub>B</sub>  
400 receptor-mediated signaling (Destexhe, 1995), a crucial intrinsic factor in the postsynaptic cells is the  
401 molecular cascade linking GABA<sub>B</sub> receptors to the GIRK channels through G-proteins. Our experimental  
402 evidence for close to linear or slightly sublinear summation of GABA<sub>B</sub> receptor-mediated responses  
403 suggests that even if amplification through G-proteins plays a role, it is unable to overturn local  
404 membrane or K<sup>+</sup> concentration dependent factors promoting sublinearity (Dascal, 1997; Inanobe &  
405 Kurachi, 2014; Stanfield et al., 2002; Wickman & Clapham, 1995). Amplification of GIRK current by G-  
406 proteins could be hampered by the need of cooperative action of up to four G-protein βγ subunits to  
407 be effective in opening GIRK channels. In addition, hyperpolarization and the accompanying relatively  
408 low [Na<sup>+</sup>]<sub>i</sub> might also limit GIRK channel activation knowing that high [Na<sup>+</sup>]<sub>i</sub> promotes GIRK channel  
409 opening in depolarized cells (Wang et al., 2016). The latter scenario might promote a brain state-  
410 dependent summation of metabotropic inhibitory signals in active neuronal networks, that remains to  
411 be tested in future experiments. On the other hand, our ultrastructural model corroborates pioneering  
412 suggestions (Á. Kulik et al., 2006; Qian & Sejnowski, 1990) that the effect of GABA<sub>B</sub> receptors is more  
413 prominent on dendritic spines compared to dendritic shafts, having approximately twice the number  
414 of activated GIRK channels per GABA<sub>B</sub> receptor on spines versus shafts. Admittedly, our simulations

415 could not cover the extensive intracellular signaling pathways known to be influenced by GABA<sub>B</sub>  
416 receptors (Gassmann & Bettler, 2012; Padgett & Slesinger, 2010; Terunuma, 2018) and future  
417 availability of comprehensive transporter and extracellular space distributions of layer 1 would enrich  
418 the model (Hrabetova, Cognet, Rusakov, & Nägerl, 2018; Korogod, Petersen, & Knott, 2015; Pallotto,  
419 Watkins, Fubara, Singer, & Briggman, 2015). Nevertheless, our experiments and simulations suggest  
420 that nonsynaptic GABAergic volume transmission providing relatively homogeneous and sufficient  
421 concentrations of GABA combined with increased clustering of GABA<sub>B</sub> receptors and on spines  
422 compared to shafts governs compartment dependent efficacy.

423 Taken together, our experimental results and modeling analysis suggest that a randomly chosen  
424 location in the neuropil of layer 1 is targeted by a moderate number (usually one or two) presynaptic  
425 NGFCs. In turn, there is no apparent gap in the neurogliaform coverage of layer 1, i.e. most elements  
426 of the neuropil including classic postsynaptic compartments, presynaptic terminals or non-neuronal  
427 cells are located sufficiently close to terminals of at least one NGFC and receive GABA nonsynaptically.  
428 Interestingly, when two NGFCs which share target territory are coactivated or a single NGFC has a  
429 limited number of consecutive spikes, linear arithmetics accompany GABA<sub>B</sub> receptor summation. This  
430 supports the hypothesis that the density and distribution of neocortical NGFCs and their axonal  
431 terminals combined with the effective range of GABAergic volume transmission appear optimized for  
432 a spatially ubiquitous and predominantly linear metabotropic GABA<sub>B</sub> receptor summation.

433

#### 434 **Acknowledgement**

435 This work was supported by the ERC INTERIMPACT project, by the Hungarian Academy of Sciences, the  
436 Hungarian National Office for Research and Technology GINOP 2.3.2-15-2016-00018, Élvonal KKP  
437 133807 and the National Brain Research Program, Hungary. We would like to thank Dr. Angus Silver  
438 for the useful comment on an early version of the manuscript, Dr. Chandrajit Bajaj for the permission  
439 of using the 3D reconstruction of a dendritic structure and Éva Tóth and Nelli Ábrahám Tóth for their  
440 exceptional technical assistance.

441

#### 442 **Author Contributions**

443 Conceptualization, G.T.; Methodology, A.O., G.K., G.M. and G.T.; Investigation, A.O., G.K., G.O. and J.B.;  
444 Software, A.O.; Formal Analysis, A.O., G.K., G.O. and G.T.; Writing – Original Draft, A.O., G.K. and G.T.;  
445 Writing – Review & Editing, G.T.; Visualization, A.O., G.K. and G.T.; Funding Acquisition, G.T.;  
446 Supervision, G.T.

#### 447 **Declaration of Interests**

448 The authors declare no competing interest.

449

450

451 **Figures**

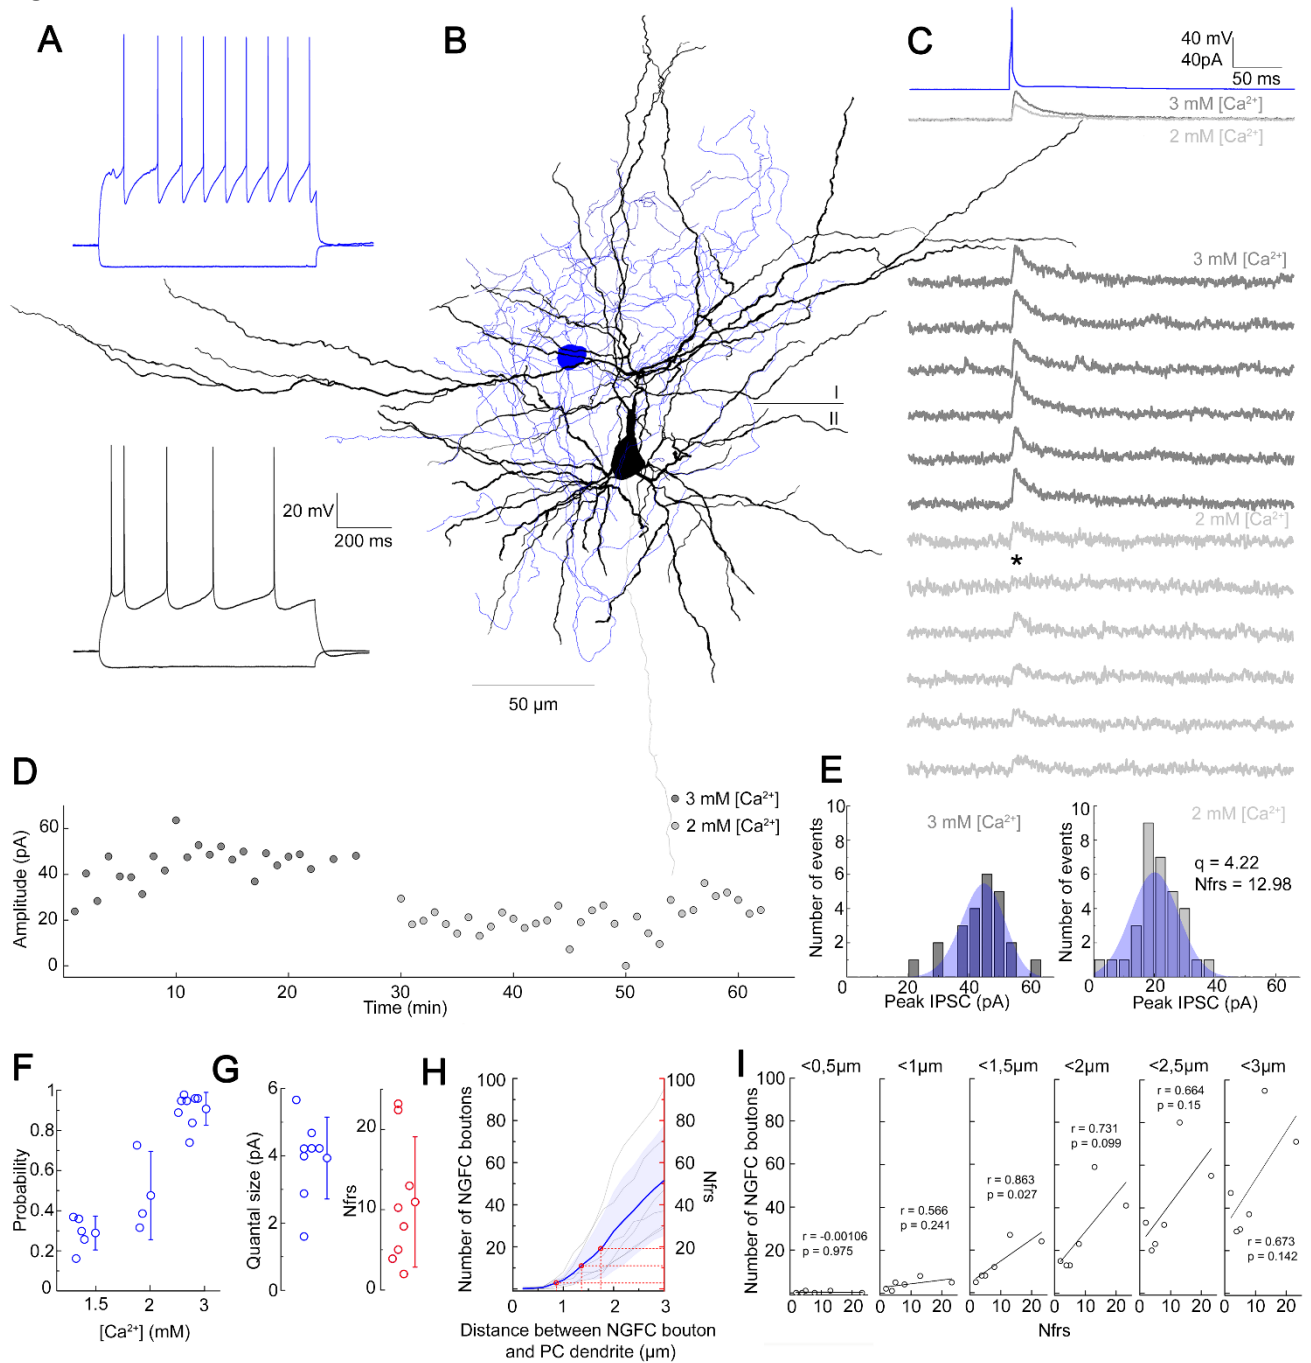

452

453 **Figure 1. Quantal and structural characteristics of GABAergic connections established by individual**  
 454 **neurogliaform cells**

- 455 (A) Firing patterns of the presynaptic NGFC (blue) and postsynaptic PC (black).  
 456 (B) Three-dimensional anatomical reconstruction of a recorded NGFC (soma and axon blue) and  
 457 PC (soma and dendrites black, axon gray).  
 458 (C) Presynaptic action potentials of the NGFC (top, blue) elicited of unitary IPSCs in the  
 459 postsynaptic PC at -50 mV holding potential in different  $\text{Ca}^{2+}$  concentrations (middle, dark gray:  
 460 3 mM  $\text{Ca}^{2+}$ , light gray 2 mM  $\text{Ca}^{2+}$ ). Bottom, representative consecutive traces of elicited unitary  
 461 IPSCs. Asterisk marks synaptic transmission failure.  
 462 (D) Single IPSC peak amplitudes recorded in high (3 mM  $\text{Ca}^{2+}$ , dark gray) and low release  
 463 probability conditions (2 mM  $\text{Ca}^{2+}$ , light gray), respectively.

- 464 (E) Distribution of IPSC peak amplitudes in 3 mM  $[Ca^{2+}]$  (left) and 2 mM  $[Ca^{2+}]$  (right), with  
 465 projected binomial fits (blue).  
 466 (F) Estimated release probability values in different experimental conditions ( $n=8$ ).  
 467 (G) Estimated quantal size ( $3.93 \pm 1.22$  pA) and number of functional release sites (Nfrs;  $10.96 \pm$   
 468  $8.1$ ) derived from Bayesian quantal analysis in each experiment ( $n=8$ ).  
 469 (H) Number of NGFC boutons in the proximity of postsynaptic PC dendrites from anatomical  
 470 reconstructions of connected NGFC to PC pairs ( $n=8$ ; gray, individual pairs; blue, average and  
 471 SD). For comparison, red lines indicate mean  $\pm$  SD of Nfrs shown on panel F corresponding to  
 472 distances between presynaptic NGFC boutons and pyramidal cell dendrites.  
 473 (I) Number of NGFC boutons counted at increasing distances from PC dendrites in NGFC to PC  
 474 pairs. Correlation to Nfrs in the same pairs is best when counting boutons closer than  $1.5 \mu\text{m}$   
 475 from PC dendrites.

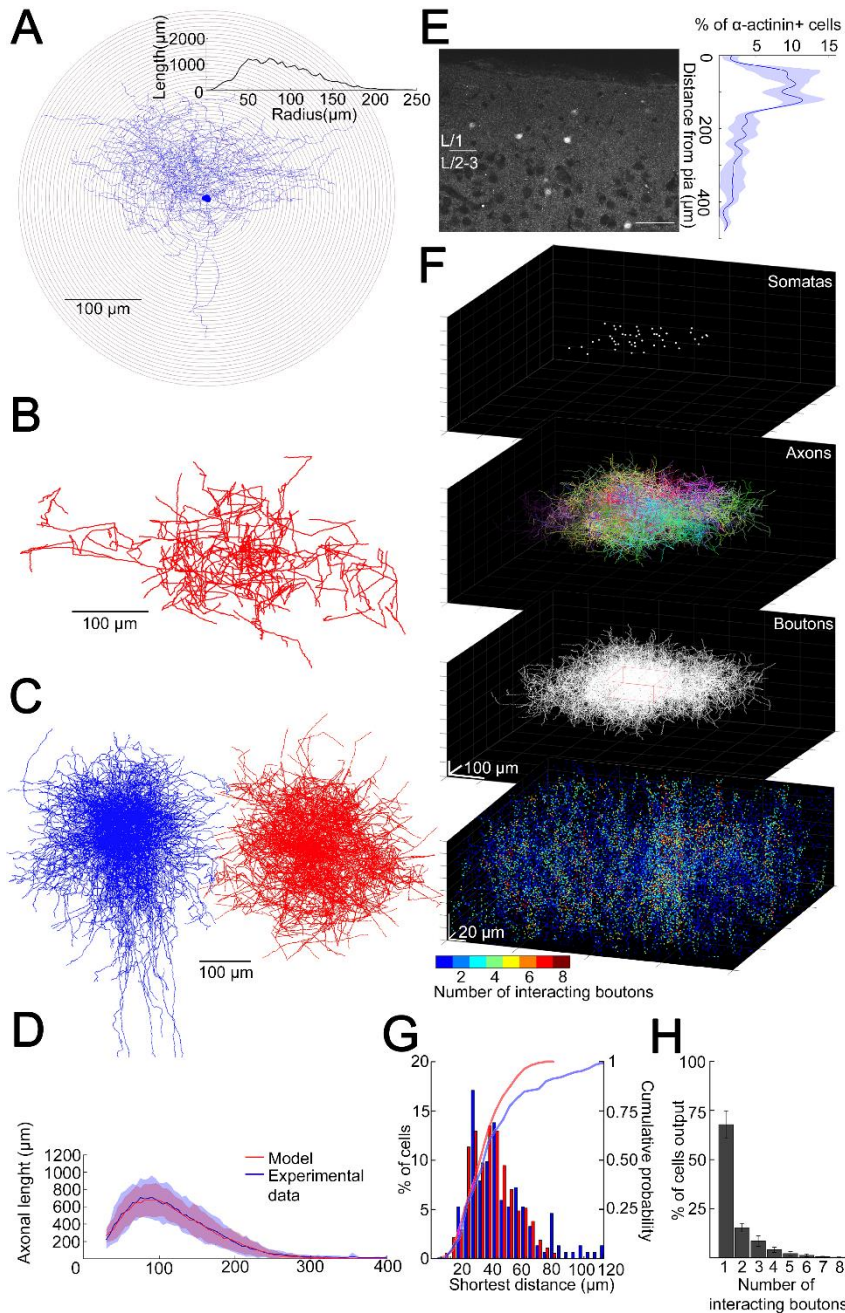

476  
 477 **Figure 2. Structural characteristics of collective GABAergic output formed by the population of layer**  
 478 **1 neurogliaform cells**



- 479 (A) Sholl analysis on the axonal arborization of an individual NGFC. Inset, axonal lengths measured  
 480 in concentric shells of increasing radius (step, 10  $\mu\text{m}$ ).  
 481 (B) Three-dimensional arborization of a model generated axon.  
 482 (C) Superimposition of three-dimensionally reconstructed axonal arborizations of NGFCs (n= 16,  
 483 blue) and the computer generated model NGFCs (n= 16, red) aligned at the center of somata.  
 484 (D) Comparison of manually reconstructed axonal arborizations of NGFCs (n= 16; blue, mean; light  
 485 blue, SD) and model generated axons (n= 52; red, mean; light red, SD)  
 486 (E) Left,  $\alpha$ -actinin2 immunohistochemistry in supragranular layers of the neocortex. Right,  
 487 distribution of  $\alpha$ -actinin2 immunopositive somata.  
 488 (F) Top, three-dimensional model of NGFCs somata, axonal arborizations and bouton distributions  
 489 in a 354 x 354 x 140  $\mu\text{m}$  volume. Bottom, heat map showing the number of axonal boutons  
 490 interacting at distances of < 1.5  $\mu\text{m}$ .  
 491 (G) Distribution of the shortest distance between somata in the model (red) and in  $\alpha$ -actinin2  
 492 immunohistochemistry experiments (blue).  
 493 (H) Percentage distribution of the number of interacting boutons within 1.5  $\mu\text{m}$  distance from  
 494 each NGFC.

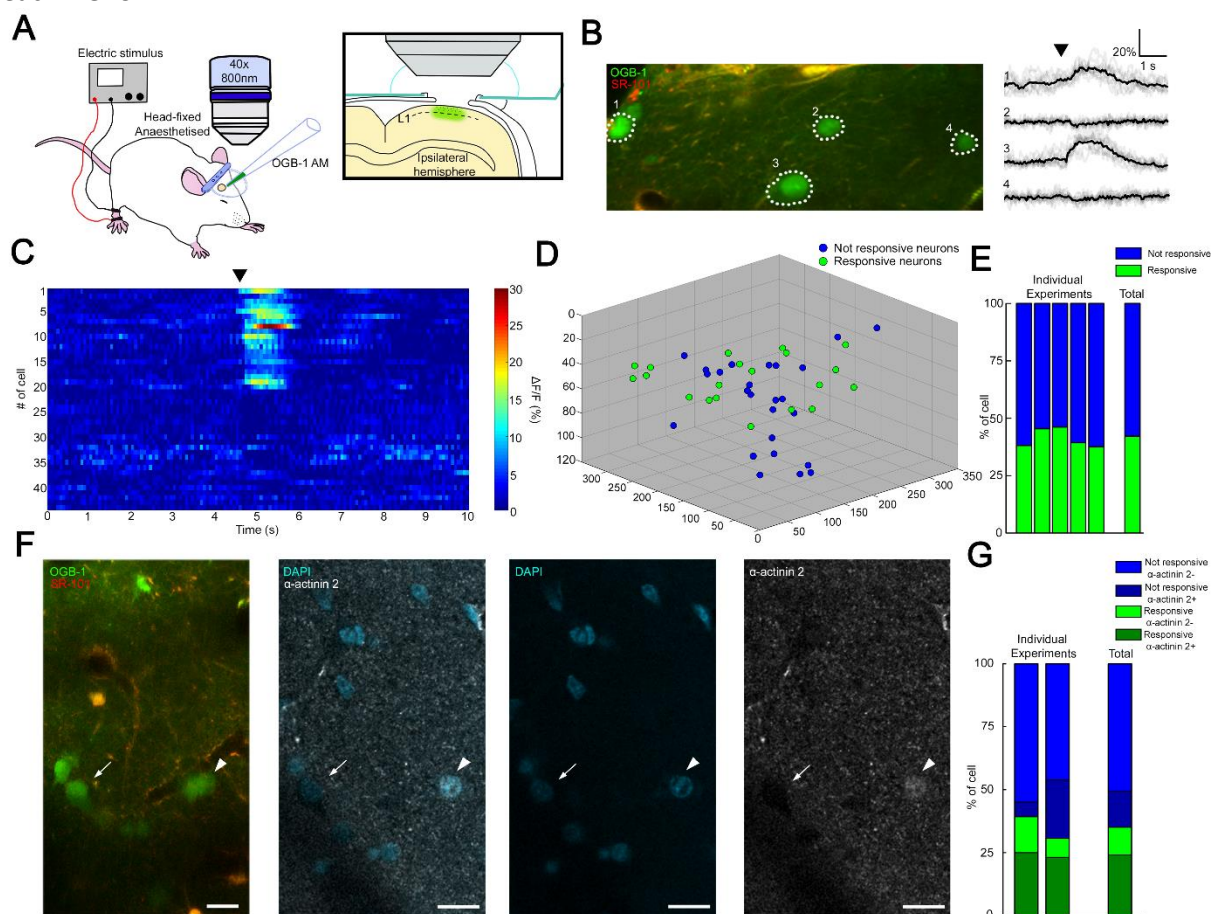

495  
 496

**Figure 3. Coactivation of neurogliaform cell population in L1 somatosensory cortex *in vivo***

- 497 (A) Experimental setup. Head-fixed anaesthetized rats were placed under a two-photon  
 498 microscope having a cranial window above the hindlimb somatosensory cortex. OGB-1 AM and  
 499 SR 101 were injected into L1. Ipsilateral hindlimb stimulation was performed with an electric  
 500 stimulator.  
 501 (B) Two-photon image of neurons that were labeled with OGB-1 in L1. SR 101 labeled astrocytes.  
 502 Right,  $\Delta F/F$  changes of  $\text{Ca}^{2+}$  signals (grey: individual traces; black: mean of 10 consecutive  
 503 traces) during series of ipsilateral stimulation (black arrowhead). Traces correspond to the  
 504 marked cells.



- 505 (C) Time-series heat map of 44 L1 interneurons evoked  $\Delta F/F$  changes in  $Ca^{2+}$  signals during  
 506 ipsilateral hindlimb stimulation (black arrowhead).  
 507 (D) Scatter plot showing the spatial location of L1 interneuron somata. Colors are corresponding  
 508 to the responsiveness (Not responsive, blue dots; responsive, green dots).  
 509 (E) Stack columns show the fraction of responsive versus not responsive cells in different  
 510 experiments (n= 5 animals). Far-right columns show the mean value.  
 511 (F) *In vivo* two-photon image showing imaged neurons. To the right, confocal images from the  
 512 same area shows immunohistochemical detection of  $\alpha$ -actinin2<sup>+</sup> neurons (arrowhead).  $\alpha$ -  
 513 actinin2<sup>-</sup> cells were visualized by exclusive DAPI staining (arrow). Scale bar, 20  $\mu$ m.  
 514 (G) Stack columns show the proportion of  $\alpha$ -actinin2 immunoreactivity among responsive versus  
 515 not responsive cells (n= 2 animals). Far-right columns show the mean value.

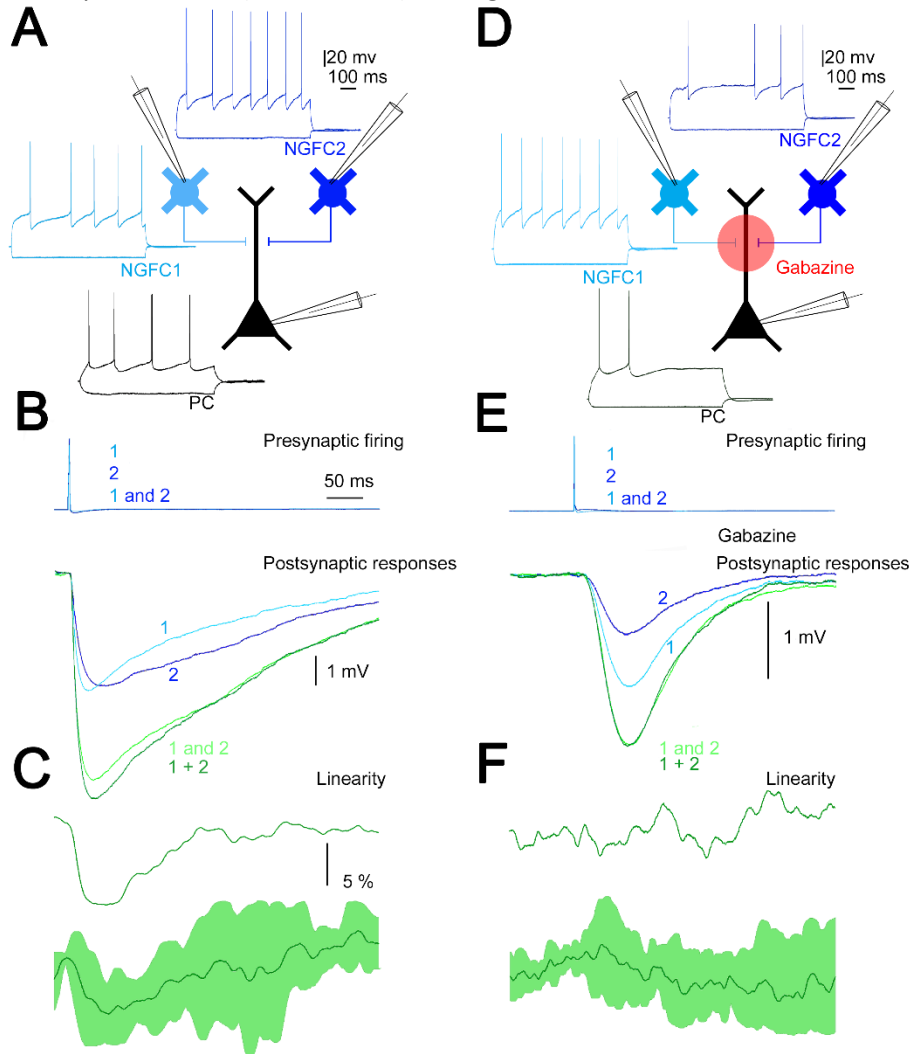

516  
 517

**Figure 4. Summation of convergent, unitary IPSPs elicited by neurogliaform cells**

- 518 (A) Schematic experimental setup of triplet recordings. Firing pattern of two presynaptic NGFCs  
 519 (light blue and blue ) and a postsynaptic pyramidal cell (black).  
 520 (B) Action potential triggered under control conditions in the NGFCs individually (1, 2) or  
 521 synchronously (1 and 2) elicited unitary (1, 2) and convergent (1 and 2) IPSPs in the  
 522 postsynaptic PC. Below, the time course of the difference between the measured (1 and 2) and  
 523 calculated (1 + 2) sums of convergent IPSPs.  
 524 (C) The linearity of response summation on populations of convergent NGFC triggered IPSPs  
 525 recorded in control conditions (n= 4) (dark green, population average; light green, SD).  
 526 (D) Same as experimental setup as (A) but in the presence of GABA<sub>A</sub> receptor antagonist, gabazine.

- 527 (E) Identical stimulation protocol as (B), note the disappearance of the difference between the  
 528 measured (1 and 2) and calculated (1 + 2) sums of convergent IPSPs.  
 529 (F) Same as (C), but under blocking GABA<sub>A</sub> receptors with gabazine (n= 8) (dark green, population  
 530 average; light green, SD).

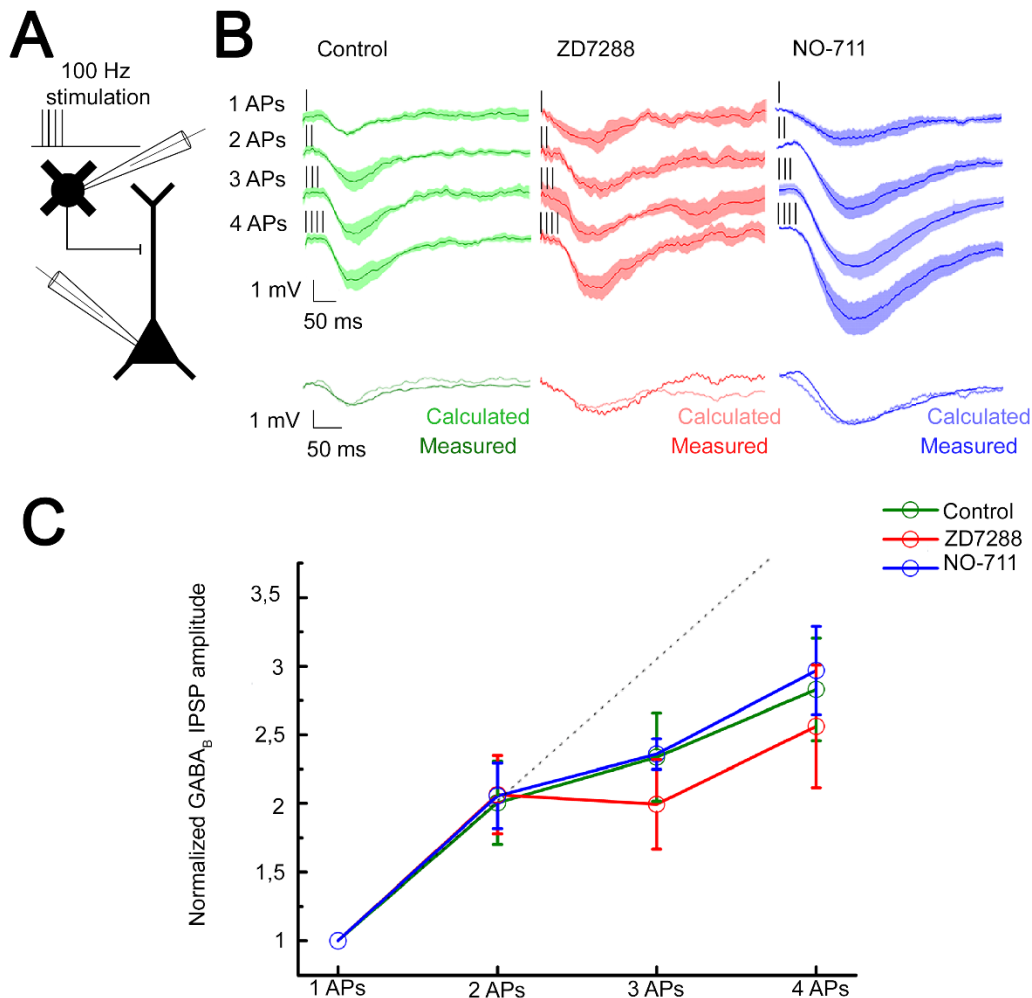

531  
 532 **Figure 5. Integration of GABA<sub>B</sub> receptor-mediated responses are not affected by HCN channel and**  
 533 **GABA reuptake**

- 534 (A) Schematic experimental setup of paired recordings. Bursts of up to four action potentials (APs)  
 535 were elicited in NGFCs at 100 Hz in the presence of gabazine.  
 536 (B) NGFC to PC paired recordings showed similar linear GABA<sub>B</sub> receptor-mediated summation  
 537 under control conditions. Top, individual traces showing IPSP kinetics upon AP burst protocol  
 538 (vertical lines indicating the triggered APs) during control (green traces, n= 6), in presence of  
 539 hyperpolarization-activated cation (HCN) channel blocker ZD7288 (red traces, n= 5) or GABA  
 540 reuptake blocker NO-711 (blue traces, n= 6). Bottom, traces show measured IPSP from two  
 541 consecutive presynaptic stimulation (measured) and the arithmetic sum of two unitary IPSP  
 542 (calculated).  
 543 (C) Summary of normalized IPSP peak amplitudes. Compare to control conditions (2APs: 2.00 ±  
 544 1.08; 3APs: 2.34 ± 1.16; 4APs: 3.17 ± 1.26) summation properties of GABA<sub>B</sub> mediated unitary  
 545 IPSPs are not effected by application of ZD7288 (2APs: 2.06 ± 1.06, p= 0.983; 3APs: 1.99 ± 1.17,  
 546 p= 0.362; 4APs: 2.56 ± 1.6, p= 0.336; two-sided MW U test) neither NO-711 (2APs: 2.06 ± 1.17,  
 547 p= 0.853; 3APs: 2.36 ± 0.31, p= 0.645; 4APs: 2.97 ± 1.54, p= 0.515; two-sided MW U test).  
 548 Dashed line indicates the linearity.

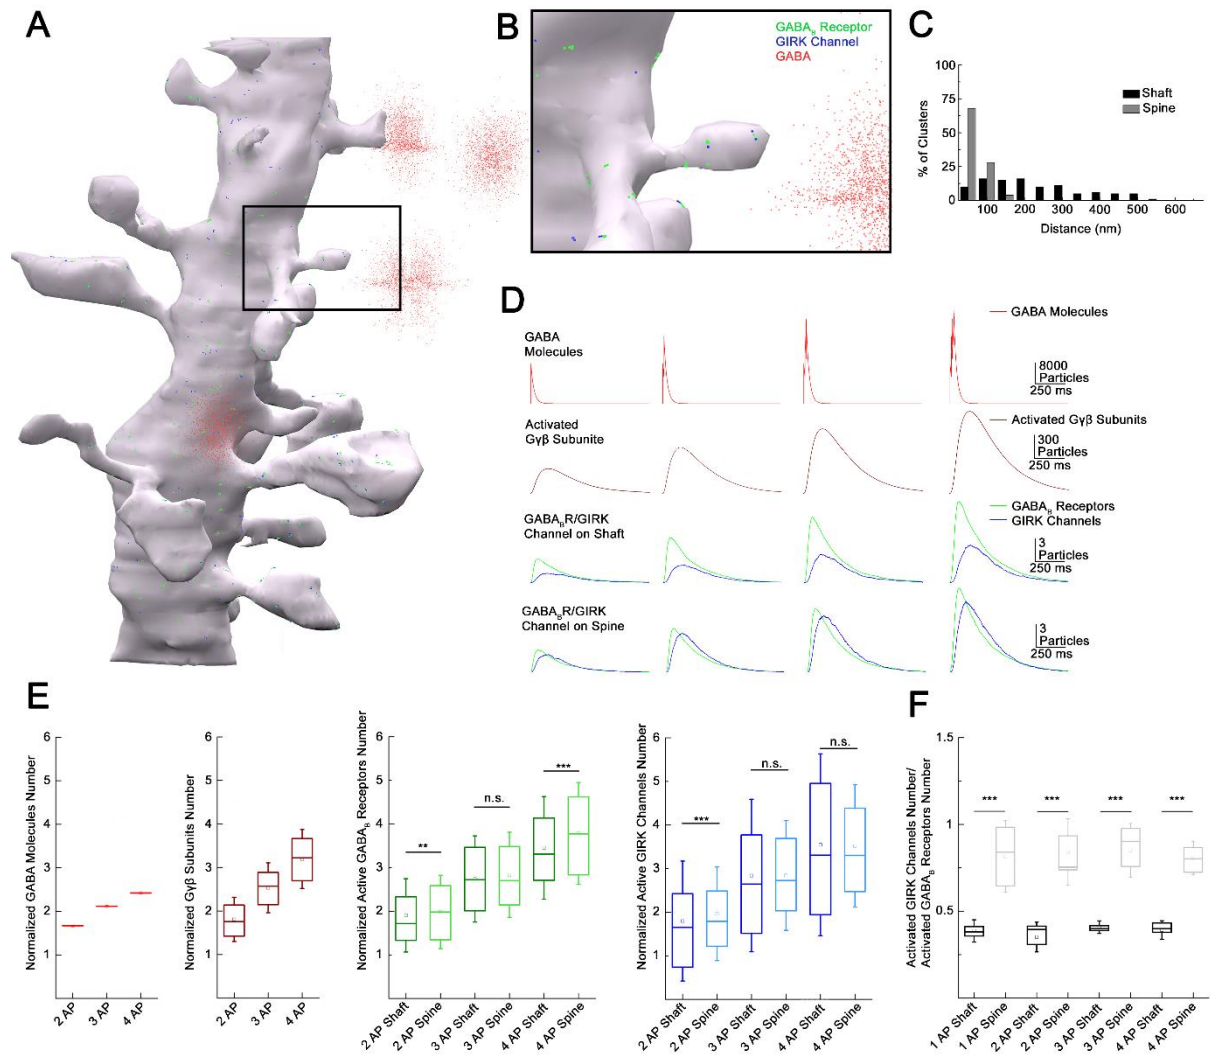

549

550 **Figure 6. Subcellular localization of GABA<sub>B</sub> receptor-GIRK channel complex determines summation**  
 551 **properties**

- 552 (A) Visualization of the complete MCell based model in the course of GABA release.  
 553 (B) Magnified view of the model.  
 554 (C) Distribution of GABA<sub>B</sub> receptors and GIRK channel clusters on the dendritic membrane in the  
 555 model (grey bars: dendritic spine; black bars: dendritic shaft).  
 556 (D) Overview of the molecular interactions during increasing GABA release. Top to bottom: NGFC  
 557 output simulated by releasing GABA (red) in the extracellular space proportional to 1-4 action  
 558 potential stimulation. Below, the total number of produced Gβγ subunits (brown) by activated  
 559 GABA<sub>B</sub> receptors (green) located on the dendritic shaft and spine. After lateral diffusion in the  
 560 plasma membrane, Gβγ subunits bind to GIRK channels (blue).  
 561 (E) Boxplot of GABA, Gβγ subunits, GABA<sub>B</sub> receptors and GIRK channels quantity normalized to  
 562 1AP (GABA: 2APs: 1.67 ± 0.004, 3APs: 2.12 ± 0.005, 4APs: 2.42 ± 0.006, Gβγ subunits: 2APs:  
 563 1.85 ± 0.51, 3APs: 2.53 ± 0.57, 4APs: 3.2 ± 0.68; GABA<sub>B</sub> receptor shaft: 2APs: 1.91 ± 0.84, 3APs:  
 564 2.74 ± 0.99, 4APs: 3.45 ± 1.18; GABA<sub>B</sub> receptor spine: 2APs: 1.98 ± 0.84, 3APs: 2.84 ± 0.98,  
 565 4APs: 3.78 ± 1.17; GIRK channel shaft: 2APs: 1.8 ± 1.37, 3APs: 2.84 ± 1.75, 4AP: 3.55 ± 2.09;  
 566 GIRK channel spine: 2APs: 1.96 ± 1.07, 3APs: 2.84 ± 1.26, 4APs: 3.52 ± 1.4). Square indicate the  
 567 mean, line shows the median inside the boxplot.  
 568 (F) Quantification of the signaling effectiveness on the shaft and spine region of the model  
 569 dendrite during increasing GABA release (1AP: shaft: 0.39 ± 0.06, spine: 0.82 ± 0.21, p < 0.005,  
 570 n = 1164, two-sided MW U test; 2AP: shaft: 0.35 ± 0.086, spine: 0.84 ± 0.19, p < 0.005, n = 534,

571 two-sided MW U test; 3AP: shaft:  $\pm 0.41 \pm 0.036$ , spine:  $0.85 \pm 0.15$ ,  $p < 0.005$ ,  $n = 1871$ , two-  
572 sided MW U test; 4AP: shaft:  $0.39 \pm 0.05$ , spine:  $0.81 \pm 0.01$ ,  $p < 0.005$ ,  $n = 709$ , two-sided MW  
573 U test ). Square indicate the mean, line shows the median inside the boxplot.  
574  
575  
576

## 577 **Methods**

### 578 ***Slice preparation***

579 Experiments were conducted to the guidelines of University of Szeged Animal Care and Use  
580 Committee. We used young adult (19 to 46-days-old, (P)  $23.9 \pm 4.9$ ) male Wistar rats for the  
581 electrophysiological experiments. Animals were anaesthetized by inhalation of halothane, and  
582 following decapitation, 320  $\mu\text{m}$  thick coronal slices were prepared from the somatosensory cortex with  
583 a vibration blade microtome (Microm HM 650 V; Microm International GmbH, Walldorf, Germany).  
584 Slices were cut in ice-cold ( $4^{\circ}\text{C}$ ) cutting solution (in mM) 75 sucrose, 84 NaCl, 2.5 KCl, 1  $\text{NaH}_2\text{PO}_4$ , 25  
585  $\text{NaHCO}_3$ , 0.5  $\text{CaCl}_2$ , 4  $\text{MgSO}_4$ , 25 d (+)-glucose, saturated with 95%  $\text{O}_2$  and 5%  $\text{CO}_2$ . The slices were  
586 incubated in  $36^{\circ}\text{C}$  for 30 minutes, subsequently the solution was changed to (in mM) 130 NaCl, 3.5 KCl,  
587 1  $\text{NaH}_2\text{PO}_4$ , 24  $\text{NaHCO}_3$ , 1  $\text{CaCl}_2$ , 3  $\text{MgSO}_4$ , 10 d (+)-glucose, saturated with 95%  $\text{O}_2$  and 5%  $\text{CO}_2$ , and the  
588 slices were kept in it until experimental use. The solution used for recordings had the same  
589 composition except that the concentrations of  $\text{CaCl}_2$  and  $\text{MgSO}_4$  were 3 mM and 1.5 mM unless it is  
590 indicated otherwise. The micropipettes (3-5 M $\Omega$ ) were filled (in mM) 126 K-gluconate, 4 KCl, 4 ATP-  
591 Mg, 0.3 GTP- $\text{Na}_2$ , 10 HEPES, 10 phosphocreatine, and 8 biocytin (pH 7.25; 300 mOsm).

592

### 593 ***In vitro Electrophysiology and Pharmacology***

594 Somatic whole-cell recordings were obtained at  $\sim 37^{\circ}\text{C}$  from simultaneously recorded triplets and  
595 doublets of NGF and PC cell visualized by infrared differential interference contrast video microscopy  
596 at depths 60-160  $\mu\text{m}$  from the surface of the slice (Zeiss Axio Examiner LSM7; Carl Zeiss AG,  
597 Oberkochen, Germany), 40x water-immersion objective (1.0 NA; Carl Zeiss AG, Oberkochen, Germany)  
598 equipped with Luigs and Neumann Junior micromanipulators (Luigs and Neumann, Ratingen,  
599 Germany) and HEKA EPC 10 patch clamp amplifier (HEKA Elektronik GmbH, Lambrecht, Germany).  
600 Signals were filtered 5 kHz, digitalized at 15 kHz, and analyzed with Patchmaster software.

601 Presynaptic cells were stimulated with a brief suprathreshold current pulse (800 pA, 2-3 ms), derived  
602 in  $>60$  s interval. In experiments, where two presynaptic NGFC were stimulated simultaneously the  
603 interval was increased  $>300$  s. The stimulation sequence, in which one or the other or both presynaptic  
604 NGFCs were stimulated was constantly altered, therefore the potential rundown effect or long term  
605 potentiation would affect all three stimulation condition equally. In the case of 100 Hz presynaptic  
606 burst stimulation the interval was increased  $>300$  s. During stimulation protocol, the order of triggering  
607 a set of 1 to 4 APs on the NGFc were randomized. The postsynaptic responses were normalized to the  
608 single AP in each individual set. During postsynaptic current-clamp recording -50 mV holding current  
609 was set. The experiments were stopped if the series resistance ( $R_s$ ) exceeded 35 M $\Omega$  or changed  
610 more than 20%. During postsynaptic voltage-clamp recordings,  $R_s$  and whole-cell capacitance were  
611 monitored continuously. The experiment was discarded if the compensated  $R_s$  change reached 20%  
612 during recording.

613 Pharmacological experiments were carried out on NGFC-PC pairs using ACSF with the following drugs:  
614 10  $\mu\text{M}$  SR 95531 hydrobromide (Tocris), 10  $\mu\text{M}$  D- (-)-2-Amino-5-phosphonopentanoic acid (D-AP5)  
615 (Tocris), 10  $\mu\text{M}$  2,3-Dioxo-6-nitro-1,2,3,4-tetrahydrobenzo[f]quinoxaline-7-sulfonamide (NBQX)  
616 (Tocris), 10  $\mu\text{M}$  4- (N-Ethyl-N-phenylamino)-1,2 dimethyl-6- (methylamino) pyrimidinium chloride  
617 (ZD7288) (Sigma-Aldich), 10  $\mu\text{M}$  1-[2-[[ (Diphenylmethylene)imino]oxy]ethyl]-1,2,5,6-tetrahydro-3-  
618 pyridinecarboxylic acid hydrochloride hydrochloride (NO711) (Sigma-Aldrich).

619 We performed Bayesian quantal analysis (BQA) by altering the extracellular  $\text{Ca}^{2+}$  and  $\text{Mg}^{2+}$  in two  
620 different conditions (Bhumbra & Beato, 2013a). One of the conditions were provide consistently a high  
621 release probability, in which the ACSF contained (in mM): 3  $\text{Ca}^{2+}$  / 1.5  $\text{Mg}^{2+}$ . For the reduced release  
622 probability we tested two different composition (in mM): either 2  $\text{Ca}^{2+}$  / 2  $\text{Mg}^{2+}$  or 1.5  $\text{Ca}^{2+}$  / 3  $\text{Mg}^{2+}$ .  
623 During BQA experiments the ACSF solution contained the following substances: 10  $\mu\text{M}$  D- (-)-2-Amino-  
624 5-phosphonopentanoic acid (D-AP5) (Tocris), 10  $\mu\text{M}$  2,3-Dioxo-6-nitro-1,2,3,4-  
625 tetrahydrobenzo[f]quinoxaline-7-sulfonamide (NBQX) (Tocris). Each epoch of the BQA experiment



626 contains a stable segment of 28 up to 42 unitary IPSCs (mean  $32.75 \pm 4.15$ ). BQA experiments required  
627 at least 60 min of recording time (up to 90 minutes). We tested all epochs for possible long-term  
628 plasticity effect by measuring the linear correlation between IPSCs amplitude and elapsed time during  
629 the experiment, and we found no or negligible correlation (Pearson's  $r$  values from all of the  
630 experiments ( $n=8$ ) were between  $-0.39$  and  $0.46$ , mean  $-0.01 \pm 0.29$ ).

631

### 632 **Immunohistochemistry and anatomical analysis**

633 After electrophysiological recordings slices were fixed in a fixative containing 4% paraformaldehyde,  
634 15% picric acid and 1.25% glutaraldehyde in 0.1 M phosphate buffer (PB; pH= 7.4) at 4°C for at least  
635 12 hr. After several washes in 0.1 M PB, slices were cryoprotected in 10% then 20% sucrose solution in  
636 0.1 M PB. Slices were frozen in liquid nitrogen then thawed in PB, embedded in 10% gelatin and further  
637 sectioned into slices of 60  $\mu\text{m}$  in thickness. Sections were incubated in a solution of conjugated avidin-  
638 biotin horseradish peroxidase (ABC; 1:100; Vector Labs) in Tris-buffered saline (TBS, pH= 7.4) at 4°C  
639 overnight. The enzyme reaction was revealed by 3'3-diaminobenzidine tetrahydrochloride (0.05%) as  
640 chromogen and 0.01%  $\text{H}_2\text{O}_2$  as an oxidant. Sections were post-fixed with 1%  $\text{OsO}_4$  in 0.1 M PB. After  
641 several washes in distilled water, sections were stained in 1% uranyl acetate, dehydrated in ascending  
642 series of ethanol. Sections were infiltrated with epoxy resin (Durcupan (Sigma-Aldich)) overnight and  
643 embedded on glass slices. Three dimensional light microscopic reconstructions were carried out using  
644 NeuroLucida system with a 100x objective.

645

### 646 **Surgery for imaging experiments**

647 Experiments were conducted to the guidelines of University of Szeged Animal Care and Use  
648 Committee. Young adult (22 to 28 days old, (P)  $24.75 \pm 2.75$ ) male Wistar rats were initially  
649 anaesthetized with halothane before urethane anaesthesia (1.4 g/kg of body weight) was  
650 administrated intraperitoneally. Body temperature was maintained at 37°C with a heating pad  
651 (Supertech Instruments, Pécs, Hungary). Before surgery dexamethasone sodium phosphate (2 mg/kg  
652 of body weight) was administrated subcutaneous, and carprofen (5 mg/kg of body weight) was  
653 administrated intraperitoneally. Anaesthetized animals head were stabilized in a stereotaxic frame and  
654 headbars were attached to the skull with dental cement (Sun Medical, Mariyama, Japan). Circular  
655 craniotomy (3 mm diameter) was made above the primary somatosensory cortex, centered at 1.5 mm  
656 posterior and 2.2 mm lateral from the bregma with a high-speed dental drill (Jinme Dental, Foshan,  
657 China). Dura mater was carefully removed surgically. Finally, the craniotomy was filled with 1.5 %  
658 agarose and covered with a coverslip to limit motion artifacts. The craniotomy was then submerged  
659 with HEPES buffered ACSF recording solution containing (in mM) 125 NaCl, 3.5 KCl, 10 HEPES, 1  $\text{MgSO}_4$ ,  
660 1  $\text{CaCl}_2$ , 0.5 d (+)-glucose, pH= 7.4.

661

### 662 **Two photon calcium imaging in L1**

663 Before covering the craniotomy with the coverslip calcium indicator Oregon Green 488 BAPTA-1 AM  
664 (10mM) (OGB-1 AM, Thermo Fisher Scientific), and astrocytic marker sulforhodamine 101 (1  $\mu\text{M}$ )  
665 (SR101, Thermo Fisher Scientific) were pressure-injected with a glass pipette (1-2  $\text{M}\Omega$ ) in L1 cortical  
666 region under the visual guide of Zeiss Axio Examiner LSM7 (Carl Zeiss AG, Oberkochen, Germany) two-  
667 photon microscope using 40x water immersion objective (W-Plan, Carl Zeiss, Germany). Subsequently,  
668 the craniotomy was filled with agarose and covered with a coverslip. Imaging experiments were  
669 performed 1 hour after preparation. The activity of L1 interneurons was monitored during ipsilateral  
670 hindlimb electrical stimulation (Digimeter, Hertfordshire, United Kingdom, 200 mA, 10 ms). OGB-1 AM  
671 was excited at 800 nm wavelength with a femtosecond pulsing Ti:sapphire laser (Mai Tai DeepSee  
672 (Spectra-physics, Santa Clara, USA)). In the somatosensory hindlimb region, Z-stack image series  
673 (volume size 304  $\mu\text{m}$  x 304  $\mu\text{m}$  x 104  $\mu\text{m}$ ) were acquired. Calcium signals from interneurons were

674 obtained within this volume in full-frame mode (256 x 100 pixel), acquired at a frequency of ~20 Hz.  
675 The  $\text{Ca}^{2+}$  dependent fluorescence change  $\Delta F/F$  was calculated as  $R(t)=(F(t)-F_0(t))/F_0(t)$  based on Jia et al  
676 2010 (Jia, Rochefort, Chen, & Konnerth, 2011). The  $R(t)$  denotes the relative change of fluorescence  
677 signal,  $F(t)$  denotes the mean fluorescence of a region of interest at a certain time point,  $F_0(t)$  denotes  
678 the time-dependent baseline. Image stabilization was performed by ImageJ (Fiji) software using the  
679 Image stabilizer plugin (Kang Li, 2008; Schneider, Rasband, & Eliceiri, 2012). At the end of the  
680 experiments, few L1 neurons were filled with biocytin containing intracellular solution to make the  
681 immunohistochemical remapping easier.

682

### 683 **Tissue preparation for immunohistochemistry**

684 After imaging experiments rats were deeply anaesthetized with ketamine and xylazine. Subsequently,  
685 perfusion was performed through the aorta, first with 0.9% saline for 1 min, then with an ice-cold  
686 fixative containing 4% paraformaldehyde in 0.1 M phosphate buffer (PB, pH= 7.4) for 15 min. The  
687 whole brain was extracted and stored in 4% paraformaldehyde for 24 hours, afterward in 0.1 M  
688 phosphate buffer (pH= 7.4) until slicing. Later 60  $\mu\text{m}$  thick sections were cut from the same two-photon  
689  $\text{Ca}^{2+}$  imaged brain area parallel to the pia mater and washed overnight in 0.1 M PB.

690

### 691 **Fluorescence immunohistochemistry and remapping**

692 After several washes in 0.1 M PB, slices were cryoprotected with 10% then 20% sucrose solution in  
693 0.1M PB than frozen in liquid nitrogen. The sections were incubated for two hours in Alexa-488  
694 conjugated streptavidin (1:400, Molecular Probes) solved in Tris-buffered saline (TBS, 0.1 M; pH= 7.4)  
695 at room temperature to visualize the biocytin labeled cells. After several washes in TBS, sections were  
696 blocked in normal horse serum (NHS, 10%) made up in TBS, followed by incubation in mouse anti-Alfa-  
697 Actinin (1:20000, Sigma-Aldrich) diluted in TBS containing 2% NHS and 0.1% Triton X-100 at room  
698 temperature for 6 hours. Following several washes in TBS, Cy3 conjugated donkey anti-mouse (1:500,  
699 Jackson ImmunoResearch) secondary antibody was used to visualize the immunoreactions. After  
700 several washes in TBS then in 0.1 M PB, slices were counterstained with DAPI (4',6-diamidino-2-  
701 phenylindole, ThermoFisher Scientific). Sections were then mounted on slides in Vectashield (Vector  
702 Laboratories). Images were taken with LSM 880 confocal laser scanning microscope (Carl Zeiss AG,  
703 Oberkochen, Germany) using 40X oil-immersion objective (1.4 NA). Confocal image z-stack was tilted  
704 and panned manually to match with the *in vivo* two photon z-stack, allowing to profile imaged  
705 interneurons. During this process biocytin labeled neurons were used as a reference point.

706

### 707 **Data analysis**

708 Electrophysiological data were analyzed with Fitmaster (HEKA Elektronik GmbH, Lambrecht,  
709 Germany), Origin 7.5 (OriginLab Corporation, Northampton, Massachusetts, USA), IgorPro  
710 (Wavemetrics, Portland, Oregon, USA). BQA experiments were analyzed using a Python written  
711 program (Bhumbra & Beato, 2013a), incorporating NumPy and SciPy packages. Two-photon calcium  
712 imaging data were acquired with ZEN 2 (Carl Zeiss AG, Oberkochen, Germany) and analyzed with  
713 MATLAB (The MathWorks, Natick, Massachusetts, USA), using Statistical Toolbox, Image Processing  
714 Toolbox, and custom written scripts.

715

### 716 **MCell model construction**

717 The model framework was constructed in Blender v2.7. The simulation environment contained a 3D  
718 reconstruction of a dendritic structure based on a series section of electron microscopic data (available  
719 from VolRoverN program (Edwards et al., 2014)), and realistically positioned release sites of NGFCs. In  
720 the simulation environment the extracellular space was also modeled by creating an array of cubic  
721 cells containing cavities based on previous work from Tao et al (Tao et al., 2005). The cubic cells have

722 800 x 800 nm length, containing cavity that is 400 x 400 nm wide and 340 nm deep. The cubic cells and  
723 the dendritic segment were spaced 32 nm apart. The established array of cubic compartments creates  
724 an extracellular space that provides a volume fraction and tortuosity identical to the cortical brain  
725 tissue (volume fraction = 0.2 and tortuosity= 1.6). The overall dimensions of the modeled space  
726 surrounding the ultrastructurally reconstructed dendrite were 13.28 x 13.28 x 6.592  $\mu\text{m}$  and the total  
727 volume was 1162.55  $\mu\text{m}^3$ .

728 Simulation of GABA<sub>B</sub> receptor- GIRK channel interaction was carried out with MCell v3.4  
729 ([www.mcell.org](http://www.mcell.org))(Kerr et al., 2008). Custom Matlab scripts created the MDL (Model Description  
730 Language) file that required for MCell simulation. MCell simulated the release and diffusion of GABA,  
731 GABA<sub>B</sub> receptors and GIRK channel interaction. First, to manage a biological like distribution for the  
732 receptors and channels a reaction cascade was used (Supplementary Fig. 3). This cascade was  
733 constructed and tested in a simple simulation environment first, containing only a plane surface. At  
734 the beginning of every iteration, primary seed particles were placed on the dendritic membrane.  
735 Primary seed particles subdivide into secondary seed particles, that which then produce GABA<sub>B</sub>  
736 receptor or GIRK channel clusters. Those secondary seed particles that produce the GIRK channel  
737 clusters - which contain 1 to 4 channels - were immobile in the membrane. Meanwhile, the secondary  
738 seed particles that produce GABA<sub>B</sub> receptor clusters – which contain 1 to 8 receptors – can diffuse  
739 laterally in the membrane. At the end the distance was defined between the center of receptor and  
740 channel clusters by calculating the distance between each receptor and channel cluster in the two-  
741 dimensional plane surface. delay and the forward rate of the reaction was set to allow secondary  
742 seeds, that generate GABA<sub>B</sub> receptor clusters to diffuse to specified distance, resulting in the required  
743 GABA<sub>B</sub> receptor-GIRK channel cluster distribution as seen from Kulik et al (A. Kulik, 2006). Optimization  
744 algorithm based on simulated annealing technique (Henderson, Jacobson, & Johnson, 2006;  
745 Kirkpatrick, Gelatt, & Vecchi, 1983) was written in Matlab for approximating the optimal values for the  
746 delay and the forward rate of the reaction. Optimal values of delay and the forward rate of the reaction  
747 was set to allow secondary seeds, that generate GABA<sub>B</sub> receptor clusters to diffuse to specified  
748 distance, resulting in the required GABA<sub>B</sub> receptor-GIRK channel cluster distribution as seen in Kulik et  
749 al. 2005.

750 Since we were interested in the interaction between the GABA<sub>B</sub> receptors and GIRK channels, our  
751 model does not include GABA<sub>A</sub> receptors and GABA amino transporters. Previous work suggest that a  
752 single AP in the NGFC generates GABA concentration of 1 to 60  $\mu\text{M}$  lasting for 20-200 ms (Karayannis  
753 et al., 2010), therefore in our model we used similar GABA concentration range of at 0.5 to 2  $\mu\text{M}$   
754 distance from the release sites.

755 Up to 6 MCell simulations were run with 1  $\mu\text{s}$  time steps in parallel on pc with Intel (R) Core i7-4790  
756 3.6 GHz CPU, 32 GB RAM. Total of 4278 iterations were simulated.

757

## 758 **Statistics**

759 The number of experimental recordings used in each experiment is indicated in the text. Statistical  
760 tests were performed using Origin 7.5 (OriginLab Corporation, Northampton, Massachusetts, USA) and  
761 SPSS software (IBM, Armonk, NY, USA). Data are represented as mean  $\pm$  standard deviation (SD). Data  
762 were first subject to a Shapiro-Wilk test of normality, and based on the result to the indicated  
763 parametric and non-parametric tests. Result were considered significantly different if  $p < 0.05$ .

764

765

766

767

768 Table 1. Parameters used for simulation

| Parameter                                      | Value                                        | References                                                                                                     |
|------------------------------------------------|----------------------------------------------|----------------------------------------------------------------------------------------------------------------|
| Total dendritic surface                        | 31,204 $\mu\text{m}^2$                       |                                                                                                                |
| Dendritic spines surface                       | 15,621 $\mu\text{m}^2$                       |                                                                                                                |
| Dendritic shaft surface                        | 15,583 $\mu\text{m}^2$                       |                                                                                                                |
| GABA <sub>B</sub> receptor density             | 36 particles/ $\mu\text{m}^2$                | (Degro, Kulik, Booker, & Vida, 2015)Degro et al., 2015                                                         |
| GIRK channel density                           | 12,2 particles/ $\mu\text{m}^2$              | (Degro et al., 2015)Degro et al., 2015                                                                         |
| Number of GABA molecules released/release site | 3750                                         |                                                                                                                |
| Free GABA diffusion coefficient                | 0.76 $\mu\text{m}^2/\text{ms}$               | (Longworth, 1952)Longworth, 1952                                                                               |
| GABA <sub>B</sub> R Kon rate                   | $5 \cdot 10^6 \text{ M}^{-1}\text{s}^{-1}$   | (Sodickson & Bean, 1996)Sodickson and Bean, 1996; (Beenhakker & Huguenard, 2010)Beenhakker and Huguenard, 2010 |
| GABA <sub>B</sub> R Koff rate                  | $5 \text{ s}^{-1}$                           | (Sodickson & Bean, 1996)Sodickson and Bean, 1996; (Beenhakker & Huguenard, 2010)Beenhakker and Huguenard, 2010 |
| Membrane associated molecules diffusion        | $4 \cdot 10^{-9} \text{ cm}^2/\text{s}$      | (Perez et al., 2006)Perez, 2006                                                                                |
| G-protein Kon rate                             | $6 \cdot 10^7 \text{ M}^{-1}\text{s}^{-1}$   | (Brinkerhoff et al., 2008)Brinkerhoff, 2008                                                                    |
| G-protein hydrolysis                           | $2-3 \text{ s}^{-1}$                         | (Breitwieser & Szabo, 1988)Breitwieser and Szabo, 1988                                                         |
| G-protein concentration                        | 1200 / $\mu\text{m}^2$                       | (Wang et al., 2016)Wang et al., 2016                                                                           |
| 1st G-protein- GIRK Kon rate                   | $2,6 \cdot 10^5 \text{ M}^{-1}\text{s}^{-1}$ | (Wang et al., 2016)Wang et al., 2016                                                                           |
| 2st G-protein- GIRK Kon rate                   | $5 \cdot 10^5 \text{ M}^{-1}\text{s}^{-1}$   | Supposition based on Wang et al 2016                                                                           |
| 3st G-protein- GIRK Kon rate                   | $1,6 \cdot 10^6 \text{ M}^{-1}\text{s}^{-1}$ | Supposition based on Wang et al 2016                                                                           |
| 4st G-protein- GIRK Kon rate                   | $10^7 \text{ M}^{-1}\text{s}^{-1}$           | (Wang et al., 2016)Wang et al., 2016                                                                           |
| G-protein – GIRK Koff rate                     | $500 \text{ s}^{-1}$                         |                                                                                                                |
| G-protein (gamma-beta) –G (alpha) Kon          | $0.7 \cdot 10^6 \text{ M}^{-1}\text{s}^{-1}$ | (Yakubovich et al., 2015)Yakubovich et al 2015                                                                 |
| G-protein (gamma-beta) –G (alpha) Koff         | $0,0013 \text{ s}^{-1}$                      | (Yakubovich et al., 2015)Yakubovich et al 2015                                                                 |
| GABA <sub>B</sub> R activation time            | 50 ms                                        | (Sodickson & Bean, 1996)Sodickson and Bean, 1996                                                               |
| GababR deactivation                            | 150 ms                                       | (Sodickson & Bean, 1996)Sodickson and Bean, 1996                                                               |
| GababR inactivation                            | 1 s                                          | (Sodickson & Bean, 1996)Sodickson and Bean, 1996                                                               |
| GIRK open time                                 | 0.9 ms                                       | (Velimirovic, Gordon, Nancy F Lim, & Clapham, 1996)Velimirovic et al., 1996                                    |
| Simulation time steps                          | $10^{-5} \text{ s}$                          |                                                                                                                |
| Simulation Iterations                          | $10^5$                                       |                                                                                                                |

769

## 770 References

- 771 Ascoli, G. A., Alonso-Nanclares, L., Anderson, S. a, Barrionuevo, G., Benavides-Piccione, R., Burkhalter,  
772 A., ... Yuste, R. (2008). Petilla terminology: Nomenclature of features of GABAergic interneurons  
773 of the cerebral cortex. *Nature Reviews Neuroscience*. <https://doi.org/10.1038/nrn2402>
- 774 Barbour, B., & Häusser, M. (1997). Intersynaptic diffusion of neurotransmitter. *Trends in*  
775 *Neurosciences*, 20(9), 377–384. [https://doi.org/10.1016/s0166-2236\(96\)20050-5](https://doi.org/10.1016/s0166-2236(96)20050-5)
- 776 Barker, B. Y. J. L., Ransom, B. R., & Neurobiology, D. (2009). AMINO ACID PHARMACOLOGY OF  
777 MAMMALIAN CENTRAL From the Laboratory of Neurophysiology , NINCDS ,. *Journal of*  
778 *Physiology*, (1978), 331–354.
- 779 Beenhakker, M. P., & Huguenard, J. R. (2010). Astrocytes as Gatekeepers of GABAB Receptor  
780 Function. *Journal of Neuroscience*, 30(45), 15262–15276.  
781 <https://doi.org/10.1523/jneurosci.3243-10.2010>
- 782 Berger, T., Larkum, M. E., & Lüscher, H. R. (2001). High I(h) channel density in the distal apical  
783 dendrite of layer V pyramidal cells increases bidirectional attenuation of EPSPs. *Journal of*  
784 *Neurophysiology*, 85(2), 855–868. <https://doi.org/10.1152/jn.2001.85.2.855>
- 785 Bettler, B., Kaupmann, K., Mosbacher, J., & Gassmann, M. (2004). Molecular Structure and  
786 Physiological Functions of GABA B Receptors . *Physiological Reviews*, 84(3), 835–867.  
787 <https://doi.org/10.1152/physrev.00036.2003>
- 788 Bezair, M. J., Raikov, I., Burk, K., Vyas, D., & Soltesz, I. (2016). Interneuronal mechanisms of  
789 hippocampal theta oscillations in a full-scale model of the rodent CA1 circuit. *ELife*, 5.  
790 <https://doi.org/10.7554/eLife.18566>

- 791 Bhumbra, G. S., & Beato, M. (2013a). Reliable evaluation of the quantal determinants of synaptic  
792 efficacy using Bayesian analysis. *Journal of Neurophysiology*, *109*(2), 603–620.  
793 <https://doi.org/10.1152/jn.00528.2012>
- 794 Bhumbra, G. S., & Beato, M. (2013b). Reliable evaluation of the quantal determinants of synaptic  
795 efficacy using Bayesian analysis. *Journal of Neurophysiology*, *109*(2), 603–620.  
796 <https://doi.org/10.1152/jn.00528.2012>
- 797 Bloss, E. B., Cembrowski, M. S., Karsh, B., Colonell, J., Fetter, R. D., & Spruston, N. (2016). Structured  
798 Dendritic Inhibition Supports Branch-Selective Integration in CA1 Pyramidal Cells. *Neuron*, *89*(5),  
799 1016–1030. <https://doi.org/10.1016/j.neuron.2016.01.029>
- 800 Breitwieser, G. E., & Szabo, G. (1988). Mechanism of muscarinic receptor-induced K<sup>+</sup> channel  
801 activation as revealed by hydrolysis-resistant GTP analogues. *The Journal of General Physiology*,  
802 *91*(4), 469–493. <https://doi.org/10.1085/jgp.91.4.469>
- 803 Brinkerhoff, C. J., Choi, J. S., & Linderman, J. J. (2008). Diffusion-limited reactions in G-protein  
804 activation: Unexpected consequences of antagonist and agonist competition. *Journal of*  
805 *Theoretical Biology*, *251*(4), 561–569. <https://doi.org/10.1016/j.jtbi.2008.01.002>
- 806 Capogna, M. (2011). Neurogliaform cells and other interneurons of stratum lacunosum-moleculare  
807 gate entorhinal-hippocampal dialogue. *The Journal of Physiology*, *589*(8), 1875–1883.  
808 <https://doi.org/10.1113/jphysiol.2010.201004>
- 809 Capogna, M., & Pearce, R. A. (2011). GABA A,slow: causes and consequences. *Trends in*  
810 *Neurosciences*, *34*(2), 101–112. <https://doi.org/10.1016/j.tins.2010.10.005>
- 811 Craig, M. T., Mayne, E. W., Bettler, B., Paulsen, O., & McBain, C. J. (2013). Distinct roles of GABAB1a-  
812 and GABAB1b-containing GABAB receptors in spontaneous and evoked termination of  
813 persistent cortical activity. *The Journal of Physiology*, *591*(Pt 4), 835–843.  
814 <https://doi.org/10.1113/jphysiol.2012.248088>
- 815 Dascal, N. (1997). Signalling Via the G Protein-Activated K<sup>+</sup> Channels. *Cellular Signalling*, *9*(8), 551–  
816 573. [https://doi.org/10.1016/S0898-6568\(97\)00095-8](https://doi.org/10.1016/S0898-6568(97)00095-8)
- 817 Degro, C. E., Kulik, A., Booker, S. A., & Vida, I. (2015). Compartmental distribution of GABAB receptor-  
818 mediated currents along the somatodendritic axis of hippocampal principal cells. *Frontiers in*  
819 *Synaptic Neuroscience*, *7*(MAR), 6. <https://doi.org/10.3389/fnsyn.2015.00006>
- 820 Destexhe, A. (1995). G protein activation kinetics and spillover of GABA may account for differences  
821 between inhibitory responses in the hippocampus and thalamus. *Neurobiology*, *92*(October),  
822 9515–9519.
- 823 Dutar, P., & Nicoll, R. A. (1988). A physiological role for GABAB receptors in the central nervous  
824 system. *Nature*, *332*(6160), 156–158. <https://doi.org/10.1038/332156a0>
- 825 Edwards, J., Daniel, E., Kinney, J., Bartol, T., Sejnowski, T., Johnston, D., ... Bajaj, C. (2014). VolRoverN:  
826 Enhancing Surface and Volumetric Reconstruction for Realistic Dynamical Simulation of Cellular  
827 and Subcellular Function. *Neuroinformatics*, *12*(2), 277–289. <https://doi.org/10.1007/s12021-013-9205-2>
- 829 Farrant, M., & Nusser, Z. (2005). Variations on an inhibitory theme: phasic and tonic activation of  
830 GABA(A) receptors. *Nature Reviews Neuroscience*, *6*(3), 215–229.  
831 <https://doi.org/10.1038/nrn1625>
- 832 Gassmann, M., & Bettler, B. (2012). Regulation of neuronal GABAB receptor functions by subunit  
833 composition. *Nature Reviews Neuroscience*, *13*(6), 380–394. <https://doi.org/10.1038/nrn3249>



- 834 Gonzalez-Burgos, G., Rotaru, D. C., Zaitsev, A. V., Povysheva, N. V., & Lewis, D. A. (2009). GABA  
835 Transporter GAT1 Prevents Spillover at Proximal and Distal GABA Synapses Onto Primate  
836 Prefrontal Cortex Neurons. *Journal of Neurophysiology*, *101*(2), 533–547.  
837 <https://doi.org/10.1152/jn.91161.2008>
- 838 Hamann, M., Rossi, D. J., & Attwell, D. (2002). Tonic and spillover inhibition of granule cells control  
839 information flow through cerebellar cortex. *Neuron*, *33*(4), 625–633.  
840 [https://doi.org/10.1016/S0896-6273\(02\)00593-7](https://doi.org/10.1016/S0896-6273(02)00593-7)
- 841 Hao, J., Wang, X. -d., Dan, Y., Poo, M. -m., & Zhang, X. -h. (2009). An arithmetic rule for spatial  
842 summation of excitatory and inhibitory inputs in pyramidal neurons. *Proceedings of the*  
843 *National Academy of Sciences*, *106*(51), 21906–21911.  
844 <https://doi.org/10.1073/pnas.0912022106>
- 845 Henderson, D., Jacobson, S. H., & Johnson, A. W. (2006). The Theory and Practice of Simulated  
846 Annealing. In *Handbook of Metaheuristics* (pp. 287–319). Boston: Kluwer Academic Publishers.  
847 [https://doi.org/10.1007/0-306-48056-5\\_10](https://doi.org/10.1007/0-306-48056-5_10)
- 848 Hrabetova, S., Cognet, L., Rusakov, D. A., & Nägerl, U. V. (2018). Unveiling the extracellular space of  
849 the brain: From super-resolved microstructure to in vivo function. *Journal of Neuroscience*,  
850 *38*(44), 9355–9363. <https://doi.org/10.1523/JNEUROSCI.1664-18.2018>
- 851 Huguenard, J. R., & Alger, B. E. (1986). Whole-cell voltage-clamp study of the fading of GABA-  
852 activated currents in acutely dissociated hippocampal neurons. *Journal of Neurophysiology*,  
853 *56*(1), 1–18. <https://doi.org/10.1152/jn.1986.56.1.1>
- 854 Inanobe, A., & Kurachi, Y. (2014). Membrane channels as integrators of G-protein-mediated signaling.  
855 *Biochimica et Biophysica Acta (BBA) - Biomembranes*, *1838*(2), 521–531.  
856 <https://doi.org/10.1016/j.bbamem.2013.08.018>
- 857 Isaacson, J. S., Solis, J. M., & Nicoll, R. A. (1993). Local and diffuse synaptic actions of GABA in the  
858 hippocampus. *Neuron*, *10*(2), 165–175. [https://doi.org/10.1016/0896-6273\(93\)90308-E](https://doi.org/10.1016/0896-6273(93)90308-E)
- 859 Jackson, J., Karnani, M. M., Zemelman, B. V., Burdakov, D., & Lee, A. K. (2018). Inhibitory Control of  
860 Prefrontal Cortex by the Claustrum. *Neuron*, *99*(5), 1029–1039.e4.  
861 <https://doi.org/10.1016/j.neuron.2018.07.031>
- 862 Jadi, M., Polsky, A., Schiller, J., & Mel, B. W. (2012). Location-Dependent Effects of Inhibition on Local  
863 Spiking in Pyramidal Neuron Dendrites. *PLoS Computational Biology*, *8*(6), e1002550.  
864 <https://doi.org/10.1371/journal.pcbi.1002550>
- 865 Jang, H. J., Chung, H., Rowland, J. M., Richards, B. A., Kohl, M. M., & Kwag, J. (2020). Distinct roles of  
866 parvalbumin and somatostatin interneurons in gating the synchronization of spike times in the  
867 neocortex. *Science Advances*, *6*(17), eaay5333. <https://doi.org/10.1126/sciadv.aay5333>
- 868 Jia, H., Rochefort, N. L., Chen, X., & Konnerth, A. (2011). In vivo two-photon imaging of sensory-  
869 evoked dendritic calcium signals in cortical neurons. *Nature Protocols*, *6*(1), 28–35.  
870 <https://doi.org/10.1038/nprot.2010.169>
- 871 Jiang, X., Shen, S., Cadwell, C. R., Berens, P., Sinz, F., Ecker, A. S., ... Tolias, A. S. (2015). Principles of  
872 connectivity among morphologically defined cell types in adult neocortex. *Science (New York,*  
873 *N.Y.)*, *350*(6264), aac9462. <https://doi.org/10.1126/science.aac9462>
- 874 Kalmbach, B. E., Buchin, A., Long, B., Close, J., Nandi, A., Miller, J. A., ... Ting, J. T. (2018). h-Channels  
875 Contribute to Divergent Intrinsic Membrane Properties of Supragranular Pyramidal Neurons in  
876 Human versus Mouse Cerebral Cortex. *Neuron*, *100*(5), 1194–1208.e5.  
877 <https://doi.org/10.1016/j.neuron.2018.10.012>

- 878 Kang Li. (2008). The image stabilizer plugin for ImageJ. Retrieved from  
879 [http://www.cs.cmu.edu/~kangli/code/Image\\_Stabilizer.html](http://www.cs.cmu.edu/~kangli/code/Image_Stabilizer.html)
- 880 Karayannis, T., Elfant, D., Huerta-Ocampo, I., Teki, S., Scott, R. S., Rusakov, D. A., ... Capogna, M.  
881 (2010). Slow GABA Transient and Receptor Desensitization Shape Synaptic Responses Evoked by  
882 Hippocampal Neurogliaform Cells. *Journal of Neuroscience*, 30(29), 9898–9909.  
883 <https://doi.org/10.1523/JNEUROSCI.5883-09.2010>
- 884 Karnani, M. M., Agetsuma, M., & Yuste, R. (2014). A blanket of inhibition: functional inferences from  
885 dense inhibitory connectivity. *Current Opinion in Neurobiology*, 26, 96–102.  
886 <https://doi.org/10.1016/j.conb.2013.12.015>
- 887 Karnani, M. M., Jackson, J., Ayzenshtat, I., Tucciarone, J., Manoocheri, K., Snider, W. G., & Yuste, R.  
888 (2016). Cooperative Subnetworks of Molecularly Similar Interneurons in Mouse Neocortex.  
889 *Neuron*, 90(1), 86–100. <https://doi.org/10.1016/j.neuron.2016.02.037>
- 890 Kerr, R. A., Bartol, T. M., Kaminsky, B., Dittrich, M., Chang, J.-C. J., Baden, S. B., ... Stiles, J. R. (2008).  
891 Fast Monte Carlo Simulation Methods for Biological Reaction-Diffusion Systems in Solution and  
892 on Surfaces. *SIAM Journal on Scientific Computing*, 30(6), 3126–3149.  
893 <https://doi.org/10.1137/070692017>
- 894 Kirkpatrick, S., Gelatt, C. D., & Vecchi, M. P. (1983). Optimization by Simulated Annealing. *Science*,  
895 220(4598), 671–680. <https://doi.org/10.1126/science.220.4598.671>
- 896 Klausberger, T. (2009). GABAergic interneurons targeting dendrites of pyramidal cells in the CA1 area  
897 of the hippocampus. *European Journal of Neuroscience*, 30(6), 947–957.  
898 <https://doi.org/10.1111/j.1460-9568.2009.06913.x>
- 899 Klausberger, T., & Somogyi, P. (2008). Neuronal Diversity and Temporal Dynamics: The Unity of  
900 Hippocampal Circuit Operations. *Science*, 321(5885), 53–57.  
901 <https://doi.org/10.1126/science.1149381>
- 902 Koch, C., Poggio, T., & Torre, V. (1983). Nonlinear interactions in a dendritic tree: localization, timing,  
903 and role in information processing. *Proceedings of the National Academy of Sciences*, 80(9),  
904 2799–2802. <https://doi.org/10.1073/pnas.80.9.2799>
- 905 Korogod, N., Petersen, C. C. H., & Knott, G. W. (2015). Ultrastructural analysis of adult mouse  
906 neocortex comparing aldehyde perfusion with cryo fixation. *ELife*, 4(AUGUST2015), 1–10.  
907 <https://doi.org/10.7554/eLife.05793>
- 908 Kulik, A. (2006). Compartment-Dependent Colocalization of Kir3.2-Containing K<sup>+</sup> Channels and  
909 GABAB Receptors in Hippocampal Pyramidal Cells. *Journal of Neuroscience*, 26(16), 4289–4297.  
910 <https://doi.org/10.1523/JNEUROSCI.4178-05.2006>
- 911 Kulik, Á., Vida, I., Fukazawa, Y., Guetg, N., Kasugai, Y., Marker, C. L., ... Shigemoto, R. (2006).  
912 Compartment-dependent colocalization of Kir3.2-containing K<sup>+</sup> channels and GABAB receptors  
913 in hippocampal pyramidal cells. *Journal of Neuroscience*, 26(16), 4289–4297.  
914 <https://doi.org/10.1523/JNEUROSCI.4178-05.2006>
- 915 Kvitsiani, D., Ranade, S., Hangya, B., Taniguchi, H., Huang, J. Z., & Kepecs, A. (2013). Distinct  
916 behavioural and network correlates of two interneuron types in prefrontal cortex. *Nature*,  
917 498(7454), 363–366. <https://doi.org/10.1038/nature12176>
- 918 Larkum, M. E., Kaiser, K. M. M., & Sakmann, B. (2002). Calcium electrogenesis in distal apical  
919 dendrites of layer 5 pyramidal cells at a critical frequency of back-propagating action potentials.  
920 *Proceedings of the National Academy of Sciences*, 96(25), 14600–14604.  
921 <https://doi.org/10.1073/pnas.96.25.14600>

- 922 London, M., & Häusser, M. (2005). Dendritic computation. *Annual Review of Neuroscience*, 28(1),  
923 503–532. <https://doi.org/10.1146/annurev.neuro.28.061604.135703>
- 924 Longworth, L. G. (1952). Diffusion Measurements, at 1°, of Aqueous Solutions of Amino Acids,  
925 Peptides and Sugars. *The Journal of the American Chemical Society*, 64(1950), 1–2.  
926 <https://doi.org/10.1021/ja01136a059>
- 927 Lörincz, A., Notomi, T., Tamás, G., Shigemoto, R., & Nusser, Z. (2002). Polarized and compartment-  
928 dependent distribution of HCN1 in pyramidal cell dendrites. *Nature Neuroscience*, 5(11), 1185–  
929 1193. <https://doi.org/10.1038/nn962>
- 930 Mańko, M., Bienvenu, T. C. M., Dalezios, Y., & Capogna, M. (2012). Neurogliaform cells of amygdala:  
931 a source of slow phasic inhibition in the basolateral complex. *The Journal of Physiology*, 590(22),  
932 5611–5627. <https://doi.org/10.1113/jphysiol.2012.236745>
- 933 Markram, H., Muller, E., Ramaswamy, S., Reimann, M. W., Abdellah, M., Sanchez, C. A., ...  
934 Schürmann, F. (2015). Reconstruction and Simulation of Neocortical Microcircuitry. *Cell*, 163(2),  
935 456–492. <https://doi.org/10.1016/j.cell.2015.09.029>
- 936 Markram, H., Toledo-Rodriguez, M., Wang, Y., Gupta, A., Silberberg, G., & Wu, C. (2004).  
937 Interneurons of the neocortical inhibitory system. *Nature Reviews Neuroscience*, 5(10), 793–  
938 807. <https://doi.org/10.1038/nrn1519>
- 939 McCarren, M., & Alger, B. E. (1985). Use-dependent depression of IPSPs in rat hippocampal pyramidal  
940 cells in vitro. *Journal of Neurophysiology*, 53(2), 557–571.  
941 <https://doi.org/10.1152/jn.1985.53.2.557>
- 942 Melone, M., Ciappelloni, S., & Conti, F. (2015). A quantitative analysis of cellular and synaptic  
943 localization of GAT-1 and GAT-3 in rat neocortex. *Brain Structure and Function*, 220(2), 885–897.  
944 <https://doi.org/10.1007/s00429-013-0690-8>
- 945 Mody, I., De Koninck, Y., Otis, T. S., & Soltesz, I. (1994). Bridging the cleft at GABA synapses in the  
946 brain. *Trends in Neurosciences*, 17(12), 517–525. [https://doi.org/10.1016/0166-2236\(94\)90155-](https://doi.org/10.1016/0166-2236(94)90155-4)  
947 4
- 948 Müller, C., Beck, H., Coulter, D., & Remy, S. (2012). Inhibitory Control of Linear and Supralinear  
949 Dendritic Excitation in CA1 Pyramidal Neurons. *Neuron*, 75(5), 851–864.  
950 <https://doi.org/10.1016/j.neuron.2012.06.025>
- 951 Oláh, S., Füle, M., Komlósi, G., Varga, C., Báldi, R., Barzó, P., & Tamás, G. (2009). Regulation of cortical  
952 microcircuits by unitary GABA-mediated volume transmission. *Nature*, 461(7268), 1278–1281.  
953 <https://doi.org/10.1038/nature08503>
- 954 Overstreet-Wadiche, L., & McBain, C. J. (2015). Neurogliaform cells in cortical circuits. *Nature*  
955 *Reviews Neuroscience*, 16(8), 458–468. <https://doi.org/10.1038/nrn3969>
- 956 Overstreet, L. S., Jones, M. V., & Westbrook, G. L. (2000). Slow desensitization regulates the  
957 availability of synaptic GABA(A) receptors. *The Journal of Neuroscience : The Official Journal of*  
958 *the Society for Neuroscience*, 20(21), 7914–7921. <https://doi.org/10.1523/JNEUROSCI.2021-99.2000> [pii]
- 959 Padgett, C. L., & Slesinger, P. A. (2010). GABAB Receptor Coupling to G-proteins and Ion Channels. In  
960 *Advances in Pharmacology* (Vol. 58, pp. 123–147). [https://doi.org/10.1016/S1054-](https://doi.org/10.1016/S1054-3589(10)58006-2)  
961 3589(10)58006-2
- 962 Pallotto, M., Watkins, P. V., Fubara, B., Singer, J. H., & Briggman, K. L. (2015). Extracellular space  
963 preservation aids the connectomic analysis of neural circuits. *eLife*, 4(2015), 1–20.  
964 <https://doi.org/10.7554/eLife.08206>

- 965 Palmer, L. M., Schulz, J. M., Murphy, S. C., Ledergerber, D., Murayama, M., & Larkum, M. E. (2012).  
966 The Cellular Basis of GABAB-Mediated Interhemispheric Inhibition. *Science*, 335(6071), 989–  
967 993. <https://doi.org/10.1126/science.1217276>
- 968 Palmer, L., Murayama, M., & Larkum, M. (2012). Inhibitory Regulation of Dendritic Activity in vivo.  
969 *Frontiers in Neural Circuits*, 6(MAY2012), 1–10. <https://doi.org/10.3389/fncir.2012.00026>
- 970 Perez, J.-B., Segura, J.-M., Abankwa, D., Pigué, J., Martínez, K. L., & Vogel, H. (2006). Monitoring the  
971 Diffusion of Single Heterotrimeric G Proteins in Supported Cell-membrane Sheets Reveals their  
972 Partitioning into Microdomains. *Journal of Molecular Biology*, 363(5), 918–930.  
973 <https://doi.org/10.1016/j.jmb.2006.08.036>
- 974 Poorthuis, R. B., Muhammad, K., Wang, M., Verhoog, M. B., Junek, S., Wrana, A., ... Letzkus, J. J.  
975 (2018). Rapid Neuromodulation of Layer 1 Interneurons in Human Neocortex. *Cell Reports*,  
976 23(4), 951–958. <https://doi.org/10.1016/j.celrep.2018.03.111>
- 977 Price, C. J. (2005). Neurogliaform Neurons Form a Novel Inhibitory Network in the Hippocampal CA1  
978 Area. *Journal of Neuroscience*, 25(29), 6775–6786. [https://doi.org/10.1523/JNEUROSCI.1135-  
979 05.2005](https://doi.org/10.1523/JNEUROSCI.1135-05.2005)
- 980 Qian, N., & Sejnowski, T. J. (1990). When is an inhibitory synapse effective? *Proceedings of the*  
981 *National Academy of Sciences*, 87(20), 8145–8149. <https://doi.org/10.1073/pnas.87.20.8145>
- 982 Robinson, R. B., & Siegelbaum, S. A. (2003). Hyperpolarization-Activated Cation Currents: From  
983 Molecules to Physiological Function. *Annual Review of Physiology*, 65(1), 453–480.  
984 <https://doi.org/10.1146/annurev.physiol.65.092101.142734>
- 985 Rózsa, M., Baka, J., Bordé, S., Rózsa, B., Katona, G., & Tamás, G. (2017). Unitary GABAergic volume  
986 transmission from individual interneurons to astrocytes in the cerebral cortex. *Brain Structure*  
987 *and Function*, 222(1), 651–659. <https://doi.org/10.1007/s00429-015-1166-9>
- 988 Scanziani, M. (2000). GABA Spillover Activates Postsynaptic GABAB Receptors to Control Rhythmic  
989 Hippocampal Activity. *Neuron*, 25(3), 673–681. [https://doi.org/10.1016/S0896-6273\(00\)81069-  
990 7](https://doi.org/10.1016/S0896-6273(00)81069-7)
- 991 Schneider, C. A., Rasband, W. S., & Eliceiri, K. W. (2012). NIH Image to ImageJ: 25 years of image  
992 analysis. *Nature Methods*, 9(7), 671–675. <https://doi.org/10.1038/nmeth.2089>
- 993 Schuman, B., Machold, R. P., Hashikawa, Y., Fuzik, J., Fishell, G. J., & Rudy, B. (2019). Four Unique  
994 Interneuron Populations Reside in Neocortical Layer 1. *The Journal of Neuroscience*, 39(1), 125–  
995 139. <https://doi.org/10.1523/JNEUROSCI.1613-18.2018>
- 996 Sheets, P. L., Suter, B. A., Kiritani, T., Chan, C. S., Surmeier, D. J., & Shepherd, G. M. G. (2011).  
997 Corticospinal-specific HCN expression in mouse motor cortex: I h -dependent synaptic  
998 integration as a candidate microcircuit mechanism involved in motor control. *Journal of*  
999 *Neurophysiology*, 106(5), 2216–2231. <https://doi.org/10.1152/jn.00232.2011>
- 1000 Silver, R. A. (2003). Estimation of nonuniform quantal parameters with multiple-probability  
1001 fluctuation analysis: theory, application and limitations. *Journal of Neuroscience Methods*,  
1002 130(2), 127–141. <https://doi.org/10.1016/j.jneumeth.2003.09.030>
- 1003 Silver, R. A. (2010). Neuronal arithmetic. *Nature Reviews Neuroscience*, 11(7), 474–489.  
1004 <https://doi.org/10.1038/nrn2864>
- 1005 Simon, A., Oláh, S., Molnár, G., Szabadics, J., & Tamás, G. (2005). Gap-Junctional Coupling between  
1006 Neurogliaform Cells and Various Interneuron Types in the Neocortex. *Journal of Neuroscience*,  
1007 25(27), 6278–6285. <https://doi.org/10.1523/jneurosci.1431-05.2005>

- 1008 Sodickson, D. L., & Bean, B. P. (1996). GABA B Receptor-Activated Inwardly Rectifying Potassium  
1009 Current in Dissociated Hippocampal CA3 Neurons. *The Journal of Neuroscience*, *16*(20), 6374–  
1010 6385. <https://doi.org/10.1523/JNEUROSCI.16-20-06374.1996>
- 1011 Staley, K. J., & Proctor, W. R. (1999). Modulation of mammalian dendritic GABA A receptor function  
1012 by the kinetics of Cl<sup>-</sup> and HCO<sub>3</sub><sup>-</sup> transport. *The Journal of Physiology*, *519*(3), 693–712.  
1013 <https://doi.org/10.1111/j.1469-7793.1999.0693n.x>
- 1014 Stanfield, P. R., Nakajima, S., & Nakajima, Y. (2002). Constitutively active and G-protein coupled  
1015 inward rectifier K<sup>+</sup> channels: Kir2.0 and Kir3.0. *Reviews of Physiology Biochemistry and*  
1016 *Pharmacology*, Vol 145, 145, 47–179.
- 1017 Sykova, E., & Nicholson, C. (2008). Diffusion in Brain Extracellular Space. *Physiological Reviews*, *88*(4),  
1018 1277–1340. <https://doi.org/10.1152/physrev.00027.2007>
- 1019 Szabadics, J., Tamas, G., & Soltesz, I. (2007). Different transmitter transients underlie presynaptic cell  
1020 type specificity of GABAA,slow and GABAA,fast. *Proc Natl Acad Sci U S A*, *104*(37), 14831–  
1021 14836.
- 1022 Tamas, G. (2003). Identified Sources and Targets of Slow Inhibition in the Neocortex. *Science*,  
1023 *299*(5614), 1902–1905. <https://doi.org/10.1126/science.1082053>
- 1024 Tamás, G., Simon Anna, A. L., & Szabadics, J. (2003). Identified Sources and Targets of Slow Inhibition  
1025 in the Neocortex. *Science*, *299*(5614), 1902 LP-1905.
- 1026 Tamás, G., Szabadics, J., & Somogyi, P. (2002). Cell Type- and Subcellular Position-Dependent  
1027 Summation of Unitary Postsynaptic Potentials in Neocortical Neurons. *The Journal of*  
1028 *Neuroscience*, *22*(3), 740–747. <https://doi.org/10.1523/JNEUROSCI.22-03-00740.2002>
- 1029 Tao, A., Tao, L., & Nicholson, C. (2005). Cell cavities increase tortuosity in brain extracellular space.  
1030 *Journal of Theoretical Biology*, *234*(4), 525–536. <https://doi.org/10.1016/j.jtbi.2004.12.009>
- 1031 Terunuma, M. (2018). Diversity of structure and function of GABAB receptors: a complexity of  
1032 GABAB-mediated signaling. *Proceedings of the Japan Academy, Series B*, *94*(10), 390–411.  
1033 <https://doi.org/10.2183/pjab.94.026>
- 1034 Thomson, A. ., & Destexhe, A. (1999). Dual intracellular recordings and computational models of slow  
1035 inhibitory postsynaptic potentials in rat neocortical and hippocampal slices. *Neuroscience*,  
1036 *92*(4), 1193–1215. [https://doi.org/10.1016/S0306-4522\(99\)00021-4](https://doi.org/10.1016/S0306-4522(99)00021-4)
- 1037 Uematsu, M., Hirai, Y., Karube, F., Ebihara, S., Kato, M., Abe, K., ... Kawaguchi, Y. (2008). Quantitative  
1038 Chemical Composition of Cortical GABAergic Neurons Revealed in Transgenic Venus-Expressing  
1039 Rats. *Cerebral Cortex*, *18*(2), 315–330. <https://doi.org/10.1093/cercor/bhm056>
- 1040 Velimirovic, B. M., Gordon, E. A., Nancy F Lim, B. N., & Clapham, D. E. (1996). The K<sup>+</sup>channel inward  
1041 rectifier subunits form a channel similar to neuronal G protein-gated K<sup>+</sup>channel. *FEBS Letters*,  
1042 *379*(1), 31–37. [https://doi.org/10.1016/0014-5793\(95\)01465-9](https://doi.org/10.1016/0014-5793(95)01465-9)
- 1043 Vida, I., Halasy, K., Szinyei, C., Somogyi, P., & Buhl, E. H. (1998). Unitary IPSPs evoked by interneurons  
1044 at the stratum radiatum-stratum lacunosum-moleculare border in the CA1 area of the rat  
1045 hippocampus in vitro. *Journal of Physiology*, *506*(3), 755–773. <https://doi.org/10.1111/j.1469-7793.1998.755bv.x>
- 1047 Wang, W., Touhara, K. K., Weir, K., Bean, B. P., & MacKinnon, R. (2016). Cooperative regulation by G  
1048 proteins and Na<sup>+</sup> of neuronal GIRK2 K<sup>+</sup> channels. *ELife*, *5*. <https://doi.org/10.7554/elife.15751>
- 1049 Wickman, K., & Clapham, D. E. (1995). Ion channel regulation by G proteins. *Physiological Reviews*,  
1050 *75*(4), 865–885. <https://doi.org/10.1152/physrev.1995.75.4.865>



- 1051 Wozny, C., & Williams, S. R. (2011). Specificity of Synaptic Connectivity between Layer 1 Inhibitory  
1052 Interneurons and Layer 2/3 Pyramidal Neurons in the Rat Neocortex. *Cerebral Cortex*, *21*(8),  
1053 1818–1826. <https://doi.org/10.1093/cercor/bhq257>
- 1054 Yakubovich, D., Berlin, S., Kahanovitch, U., Rubinstein, M., Farhy-Tselnicker, I., Styr, B., ... Dascal, N.  
1055 (2015). A Quantitative Model of the GIRK1/2 Channel Reveals That Its Basal and Evoked  
1056 Activities Are Controlled by Unequal Stoichiometry of  $G\alpha$  and  $G\beta\gamma$ . *PLOS Computational Biology*,  
1057 *11*(11), e1004598. <https://doi.org/10.1371/journal.pcbi.1004598>
- 1058 Yao, X. H., Wang, M., He, X. N., He, F., Zhang, S. Q., Lu, W., ... Yu, Y. C. (2016). Electrical coupling  
1059 regulates layer 1 interneuron microcircuit formation in the neocortex. *Nature Communications*,  
1060 *7*, 1–15. <https://doi.org/10.1038/ncomms12229>
- 1061
- 1062

1063 **Supplementary Information**

1064

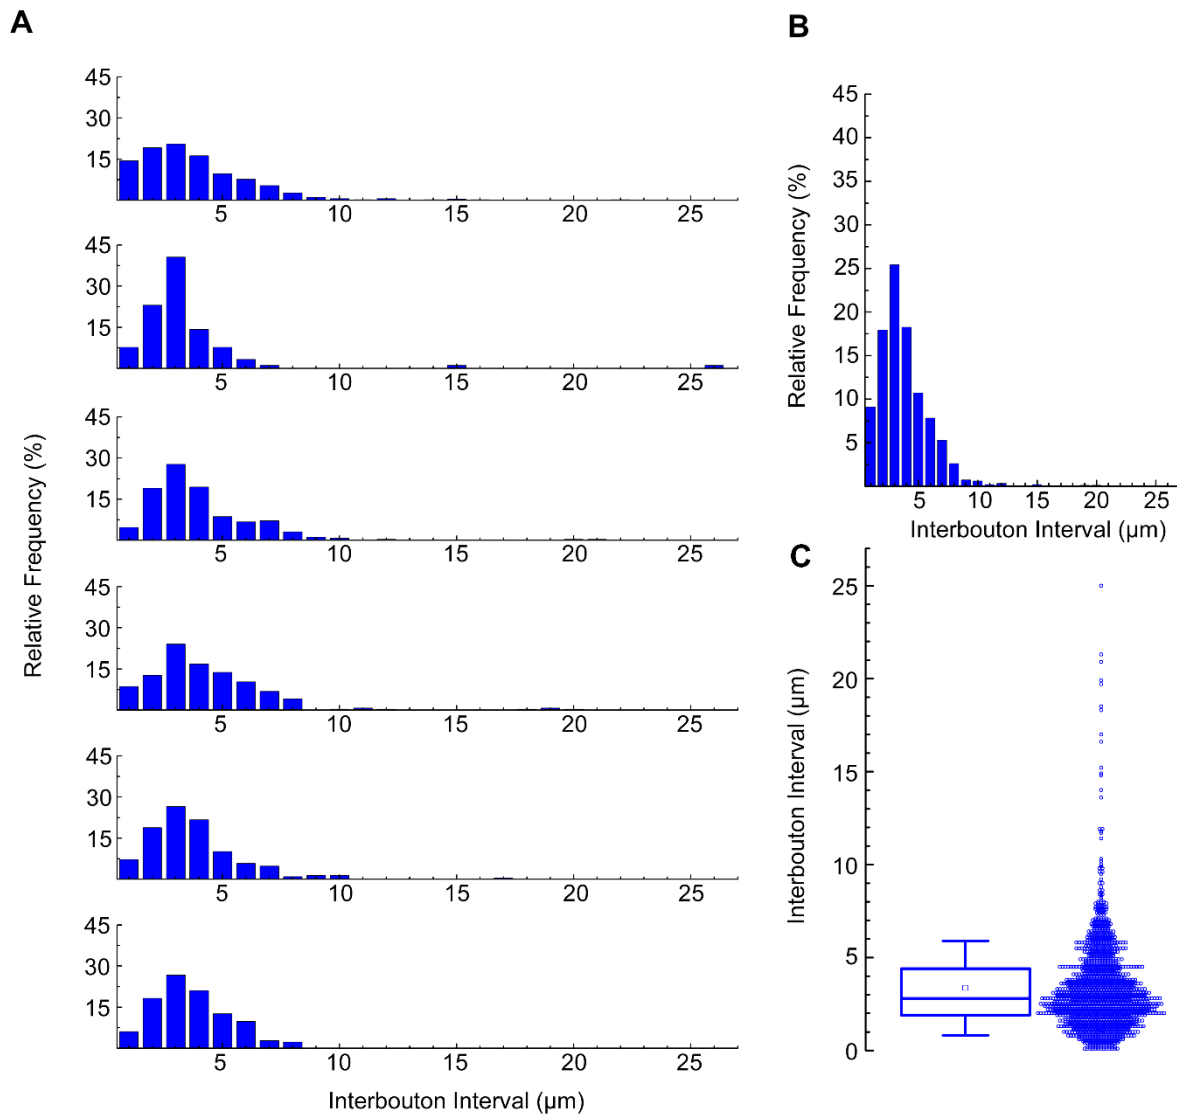

1065

1066 **Sup. Fig 1.- Related to Fig 2. Calculation of NGFC's interbouton interval. (a)** Distribution of interbouton  
1067 distances from 6 NGFCs (number of boutons from each morphological analysis were  
1068  $n=442,91,213,252,291,207$ ). The axonal segments were randomly selected (bin size =  $1\mu\text{m}$ ). (b)  
1069 Average distribution of interbouton intervals in all NGFCs (bin size =  $1\mu\text{m}$ ). (c) Boxplot shows the  
1070 mean $\pm$ SD ( $3.357\pm 2.535$ ;  $n=1495$ ) of all NGFCs' interbouton interval.

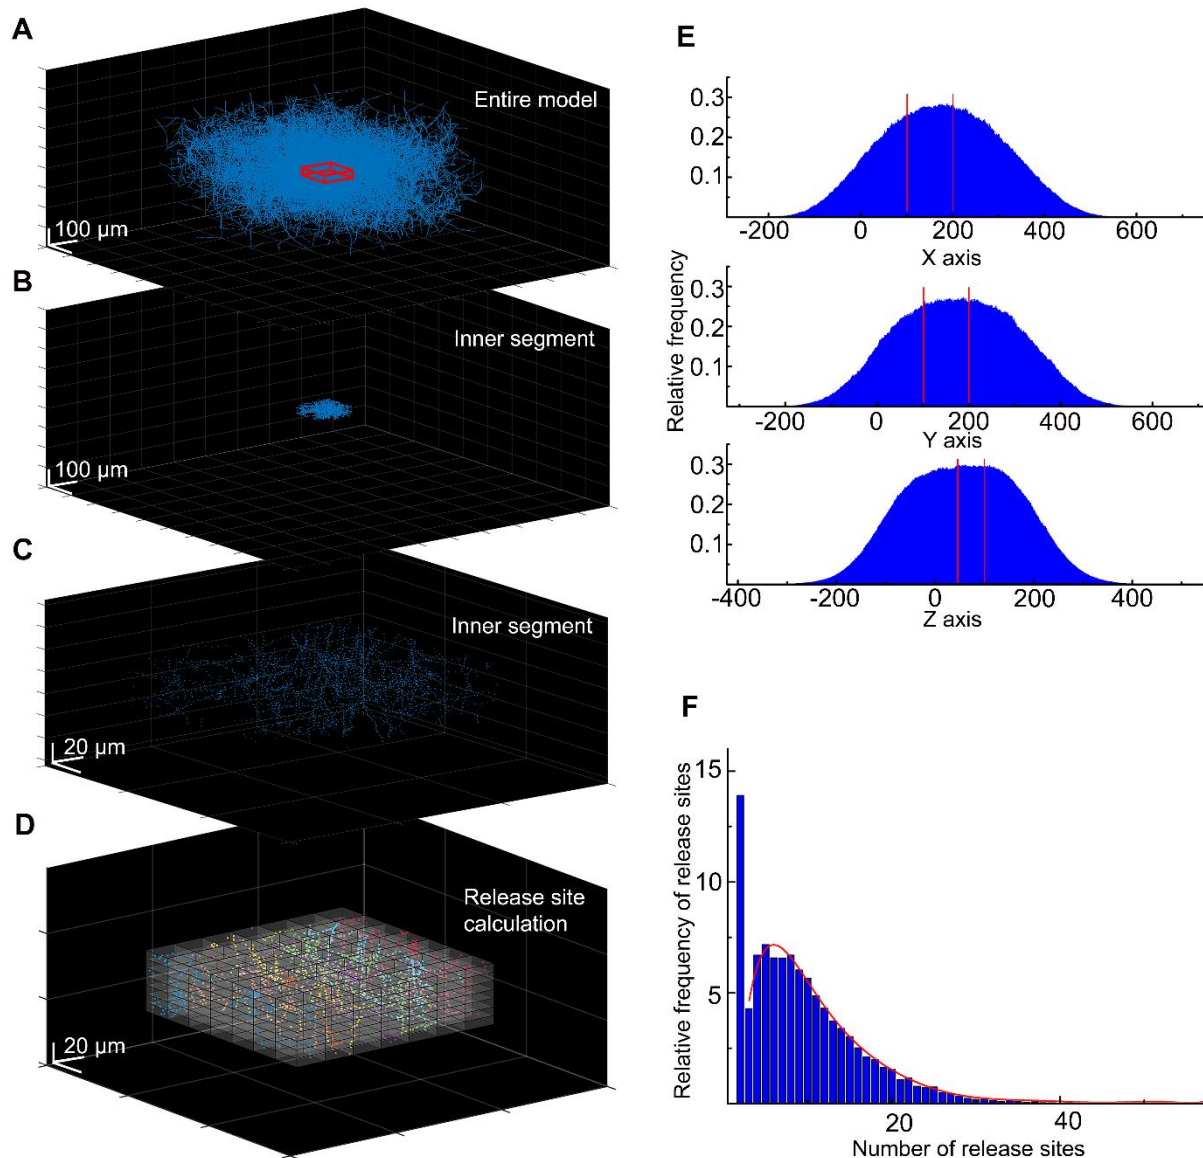

1071

1072 **Sup. Fig. 2- Related to Fig 6. Calculation of the NGFC release site density for the MCell model.** (a) In  
1073 the spatial model of the NGFC population, the density of axonal processes and release sites are rapidly  
1074 declining around the model's outskirts. To avoid underrepresentation of release sites, we collected  
1075 data from the inner section of the model, from a 100x100x50 μm sized cuboid (showed in red). (b)  
1076 Within these boundaries (the section between the two red lines) the high density of release sites is  
1077 preserved alongside all three axes. (c) In the inner segment of the model, we calculated the frequency  
1078 of release sites in smaller 13.28x13.28x3.592 μm sized cuboids. (d) We calculated the release site  
1079 frequency within the inner segments in all (n=36) simulations in 13.28x13.28x3.592 μm volumes. (e) In  
1080 each simulation, on average  $2611.5 \pm 691.96$  and a total of 94014 release sites were calculated. (f) Data  
1081 shows that 13.9% of segmented volumes do not contain release sites. In 86.1% of segmented volumes,  
1082 the release site frequency shows a skewed distribution from 1 to 56 (mean:  $7.61 \pm 6.71$ ). The red line  
1083 shows the fitting of this data.

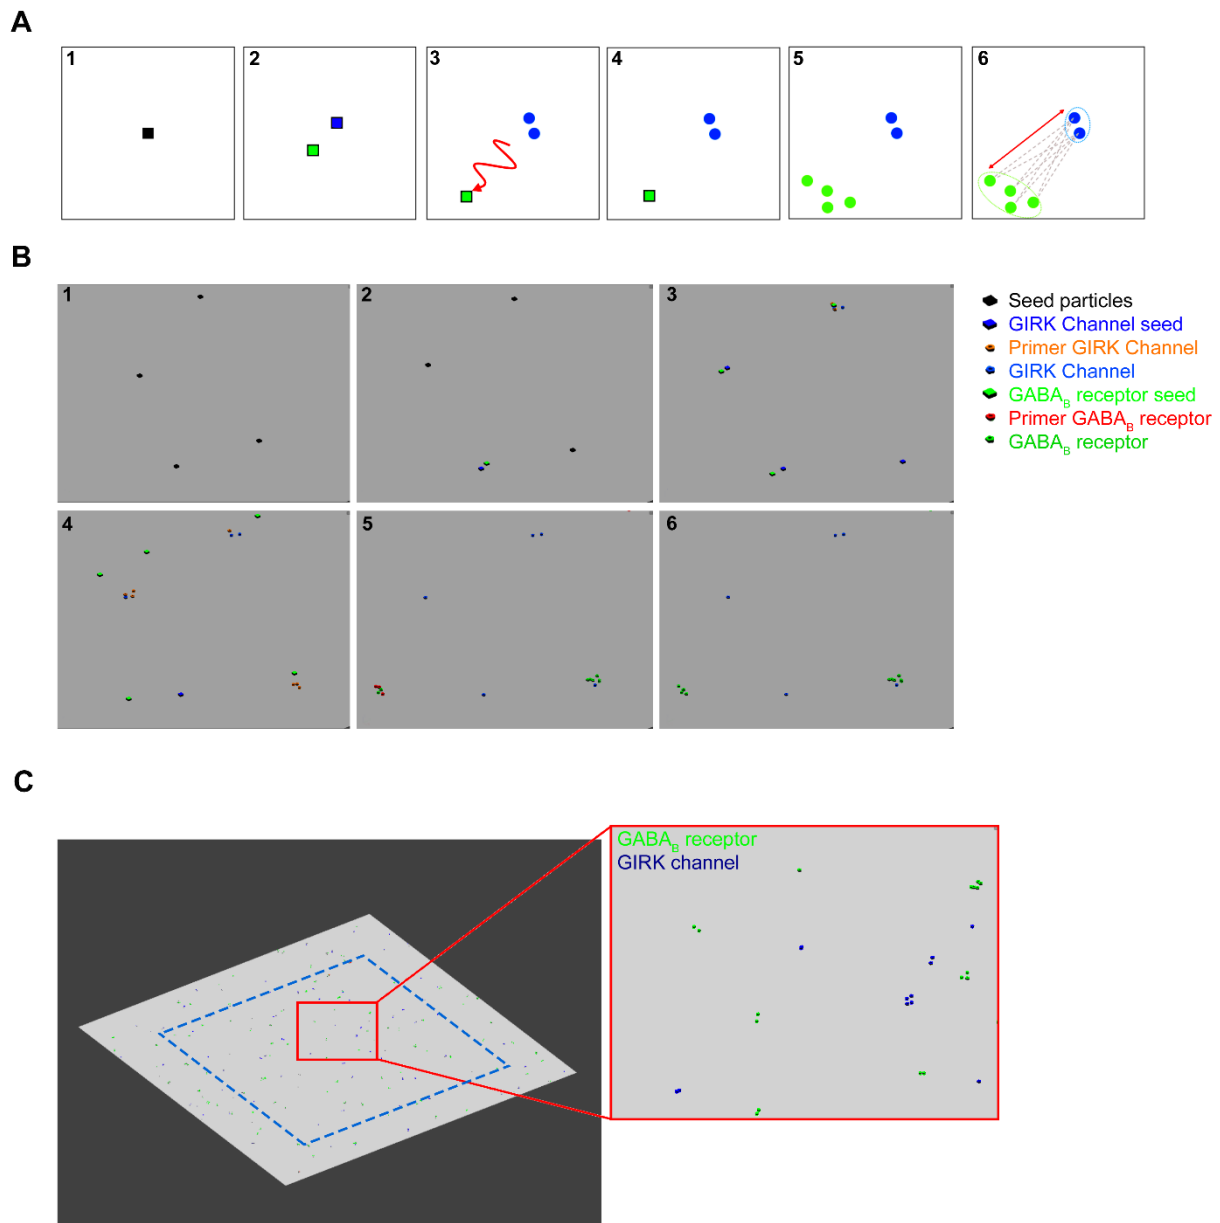

1084

1085 **Sup. Fig. 3. GABA<sub>B</sub> receptor and GIRK channel distribution, created by a cascade reaction.** (a) To  
1086 create a pseudorandom distribution the molecular interactions the following steps were defined as  
1087 the schematic concept: (1) Seed particles (black square) were placed randomly along the membrane  
1088 surface. (2) The seed particles produce two distinctive particles: the first particle, the GIRK channel  
1089 seed (blue square) that immediately creates GIRK channels (blue circles) and it remains immobile. (4)  
1090 The second particle is the GABA<sub>B</sub> receptor seed (green square), which has the ability to laterally diffuse.  
1091 (5) The probabilistic distance between the static GIRK channels and the GABA<sub>B</sub> receptor seed can be  
1092 adjusted by limiting the time while it is mobile. After became immobile, the GABA<sub>B</sub> receptor seed  
1093 produces GABA<sub>B</sub> receptors. (6) The distance between each GIRK channel and the nearest GABA<sub>B</sub>  
1094 receptors was calculated. (b) Image sequences show the particle interactions in the MCell model: (1)  
1095 Primer seed particles were placed randomly, (2) which produce GIRK channel seed and GABA<sub>B</sub> receptor  
1096 seed particles. (3) GIRK channel seed particles remain in the same place, the GABA<sub>B</sub> receptor seed  
1097 particles laterally diffuse away. (4) GIRK channel seed particles produce 1 to 4 GIRK channels by first

1098 creating 4 primer GIRK channel particles that either disappear or produce a final GIRK channel. This  
1099 step was created to avoid uniform cluster generation. (5) GABA<sub>B</sub> receptor seeds lateral diffusion time  
1100 was optimized to regulate the probabilistic distance between the cluster. GABA<sub>B</sub> receptor seed  
1101 generated 1 to 8 GABA<sub>B</sub> receptors, that either disappeared or produced a functional receptor. (6)  
1102 Finally, distances were measured between the closest receptor and channel cluster. (c) Images show  
1103 the two-dimensional plane and inset of a zoomed image of the final distribution. Distances were only  
1104 measured from the GIRK channels that were inside the blue dashed line.

1105



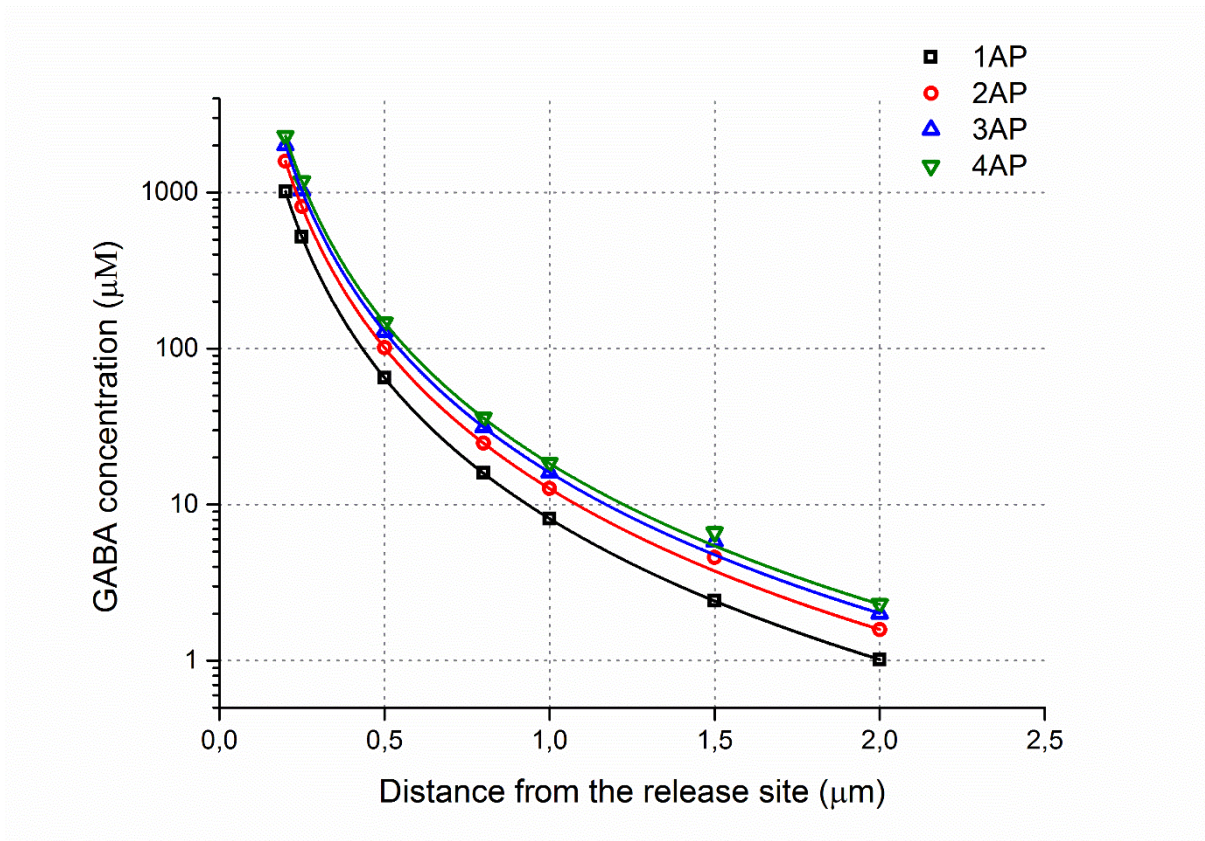

1106

1107 **Sup. Fig 4. Estimated GABA spatial concentration profiles during multiple releases.** A plot of the GABA  
1108 concentrations versus distance from the release site in the MCell model.

1109

| Distance from the release site ( $\mu\text{m}$ ) | GABA concentration ( $\mu\text{M}$ ) |          |         |         |
|--------------------------------------------------|--------------------------------------|----------|---------|---------|
|                                                  | 1 AP                                 | 2AP      | 3AP     | 4AP     |
| 0.2                                              | 1017.06                              | 1584.614 | 2010.05 | 2296.08 |
| 0.25                                             | 520.97                               | 811.56   | 1029.45 | 1175.94 |
| 0.5                                              | 65.022                               | 101.28   | 128.48  | 146.76  |
| 0.8                                              | 15.92                                | 24.8     | 31.46   | 35.94   |
| 1                                                | 8.13                                 | 12.67    | 16.07   | 18.4    |
| 1.5                                              | 2.42                                 | 4.58     | 5.81    | 6.64    |
| 2                                                | 1.02                                 | 1.58     | 2.01    | 2.3     |

1110

1111 **Sup. Table 1. Different estimated GABA concentrations as a function of distance**

1112
